# Supplementary material for: Aqueous emissive cyclometalated iridium photoreductants: synthesis, computational analysis and the photocatalytic reduction of 4-nitrophenol
Source: Royal Society of Chemistry journal article supplement (doi:10.1039/d4dt00766b), 2024-01-01
Supplement: d4dt00766b1.pdf [file d4dt00766b1.pdf]

## Electronic Supplementary Information

### **Aqueous Emissive Cyclometalated Iridium Photoreductant: Synthesis, Computational and Photocatalytic Reduction of 4- nitrophenol**

Saumyaranjan Mishra and Srikanta Patra\*

School of Basic Sciences, Indian Institute of Technology Bhubaneswar, Argul, Jatni, Odisha -752050, India

Email: [srikanta@iitbbs.ac.in](mailto:srikanta@iitbbs.ac.in)

| Figures/Tables    | Description                                                                                                                                                                                                                                                                       | Page No    |
|-------------------|-----------------------------------------------------------------------------------------------------------------------------------------------------------------------------------------------------------------------------------------------------------------------------------|------------|
| <b>Scheme S1</b>  | Synthetic Scheme for the preparation of ligands <b>L</b> <sup>1</sup> – <b>L</b> <sup>4</sup> and their dimeric precursors.                                                                                                                                                       | <b>S3</b>  |
| <b>Scheme S2</b>  | Synthetic scheme for the preparation of complexes                                                                                                                                                                                                                                 | <b>S4</b>  |
| <b>Figure S1</b>  | <sup>1</sup> H NMR spectra of the ligands <b>L</b> <sup>1</sup> – <b>L</b> <sup>4</sup> in (CD <sub>3</sub> ) <sub>2</sub> SO.                                                                                                                                                    | <b>S5</b>  |
| <b>Figure S2</b>  | Experimental (blue) and simulated (red) high-resolution mass spectra (HRMS) of the complexes [ <b>1</b> ] <sup>3+</sup> - [ <b>4</b> ] <sup>3+</sup> .                                                                                                                            | <b>S6</b>  |
| <b>Figure S3</b>  | <sup>1</sup> H NMR spectra of the complexes [ <b>1</b> ] <sup>3+</sup> – [ <b>4</b> ] <sup>3+</sup> in (CD <sub>3</sub> ) <sub>2</sub> SO.                                                                                                                                        | <b>S7</b>  |
| <b>Figure S4</b>  | <sup>13</sup> C NMR spectra of the complexes [ <b>1</b> ] <sup>3+</sup> – [ <b>4</b> ] <sup>3+</sup> in (CD <sub>3</sub> ) <sub>2</sub> SO.                                                                                                                                       | <b>S8</b>  |
| <b>Figure S5</b>  | <sup>19</sup> F NMR spectra of the complexes [ <b>1</b> ] <sup>3+</sup> – [ <b>4</b> ] <sup>3+</sup> in (CD <sub>3</sub> ) <sub>2</sub> SO.                                                                                                                                       | <b>S9</b>  |
| <b>Figure S6</b>  | <sup>1</sup> H- <sup>1</sup> H COSY spectra of complex [ <b>1</b> ] <sup>3+</sup> in (CD <sub>3</sub> ) <sub>2</sub> SO.                                                                                                                                                          | <b>S10</b> |
| <b>Table S1</b>   | B3LYP optimised coordinates of complex [ <b>1</b> ] <sup>3+</sup> in gas phase.                                                                                                                                                                                                   | <b>S11</b> |
| <b>Table S2</b>   | B3LYP optimised coordinates of complex [ <b>2</b> ] <sup>3+</sup> in gas phase.                                                                                                                                                                                                   | <b>S13</b> |
| <b>Table S3</b>   | B3LYP optimised coordinates of complex [ <b>3</b> ] <sup>3+</sup> in gas phase.                                                                                                                                                                                                   | <b>S15</b> |
| <b>Table S4</b>   | B3LYP optimised coordinates of complex [ <b>4</b> ] <sup>3+</sup> in gas phase.                                                                                                                                                                                                   | <b>S17</b> |
| <b>Figure S7</b>  | B3LYP optimised geometry of the complexes [ <b>1</b> ] <sup>3+</sup> – [ <b>3</b> ] <sup>3+</sup> and their SCF energies in gas phase.                                                                                                                                            | <b>S19</b> |
| <b>Figure S8</b>  | DFT optimised frontier orbitals of the complex [ <b>1</b> ] <sup>3+</sup> in gas phase.                                                                                                                                                                                           | <b>S20</b> |
| <b>Figure S9</b>  | DFT optimised frontier orbitals of the complex [ <b>2</b> ] <sup>3+</sup> in gas phase.                                                                                                                                                                                           | <b>S21</b> |
| <b>Figure S10</b> | DFT optimised frontier orbitals of the complex [ <b>3</b> ] <sup>3+</sup> in gas phase.                                                                                                                                                                                           | <b>S22</b> |
| <b>Figure S11</b> | DFT optimised frontier orbitals of the complex [ <b>4</b> ] <sup>3+</sup> in gas phase.                                                                                                                                                                                           | <b>S23</b> |
| <b>Figure S12</b> | Spin density plot (T1 state) for complexes [ <b>1</b> ] <sup>3+</sup> - [ <b>4</b> ] <sup>3+</sup> .                                                                                                                                                                              | <b>S24</b> |
| <b>Table S5</b>   | Molecular orbital composition of the complexes [ <b>1</b> ] <sup>3+</sup>                                                                                                                                                                                                         | <b>S25</b> |
| <b>Table S6</b>   | Molecular orbital composition of the complexes [ <b>2</b> ] <sup>3+</sup>                                                                                                                                                                                                         | <b>S26</b> |
| <b>Table S7</b>   | Molecular orbital composition of the complexes [ <b>3</b> ] <sup>3+</sup>                                                                                                                                                                                                         | <b>S27</b> |
| <b>Table S8</b>   | Molecular orbital composition of the complexes [ <b>4</b> ] <sup>3+</sup>                                                                                                                                                                                                         | <b>S28</b> |
| <b>Table S9</b>   | TDDFT calculated vertical transition of complex [ <b>1</b> ] <sup>3+</sup>                                                                                                                                                                                                        | <b>S29</b> |
| <b>Table S10</b>  | TDDFT calculated vertical transition of complex [ <b>2</b> ] <sup>3+</sup>                                                                                                                                                                                                        | <b>S30</b> |
| <b>Table S11</b>  | TDDFT calculated vertical transition of complex [ <b>3</b> ] <sup>3+</sup>                                                                                                                                                                                                        | <b>S31</b> |
| <b>Table S12</b>  | TDDFT calculated vertical transition of complex [ <b>4</b> ] <sup>3+</sup>                                                                                                                                                                                                        | <b>S32</b> |
| <b>Table S13</b>  | Calculated triplet states for complex [ <b>1</b> ] <sup>3+</sup>                                                                                                                                                                                                                  | <b>S33</b> |
| <b>Table S14</b>  | Calculated triplet states for complex [ <b>2</b> ] <sup>3+</sup>                                                                                                                                                                                                                  | <b>S34</b> |
| <b>Table S15</b>  | Calculated triplet states for complex [ <b>3</b> ] <sup>3+</sup>                                                                                                                                                                                                                  | <b>S35</b> |
| <b>Table S16</b>  | Calculated triplet states for complex [ <b>4</b> ] <sup>3+</sup>                                                                                                                                                                                                                  | <b>S36</b> |
| <b>Figure S13</b> | <sup>1</sup> H NMR spectra monitoring the photocatalytic reduction of 4-nitrophenol to 4-aminophenol at different time interval. The reaction mixture consists of 4-nitrophenol (10mM), [ <b>4</b> ] <sup>3+</sup> (0.1mM) and NEt <sub>3</sub> (1.0M) in pH-9.1 buffer solution. | <b>S37</b> |
| <b>Figure S14</b> | Plot for the (a) Absorption spectra of [Fe(Phen) <sub>3</sub> ] <sup>2+</sup> and (b) absorbance of [Fe(Phen) <sub>3</sub> ] <sup>2+</sup> (at 510 nm) at different time interval.                                                                                                | <b>S38</b> |
| <b>Figure S15</b> | Plot for the (a) number of moles of Fe <sup>2+</sup> formed with respect to time (b) number of moles of 4-nitrophenol reduced with respect to the moles of photons absorbed by the complex [ <b>4</b> ] <sup>3+</sup> .                                                           | <b>S39</b> |
| <b>Figure S16</b> | Stern-Volmer plot for fluorescence quenching of [ <b>4</b> ] <sup>3+</sup> in the presence of (a) NEt <sub>3</sub> and (b) 4-nitrophenol and (c) dioxygen.                                                                                                                        | <b>S40</b> |
| <b>Figure S17</b> | Plausible mechanism for the reduction of 4-nitrophenol by [ <b>4</b> ] <sup>3+</sup> .                                                                                                                                                                                            | <b>S41</b> |

**Scheme S1.** Synthetic Scheme for the preparation of ligands **L**<sup>1</sup> – **L**<sup>4</sup> and their dimeric precursors.

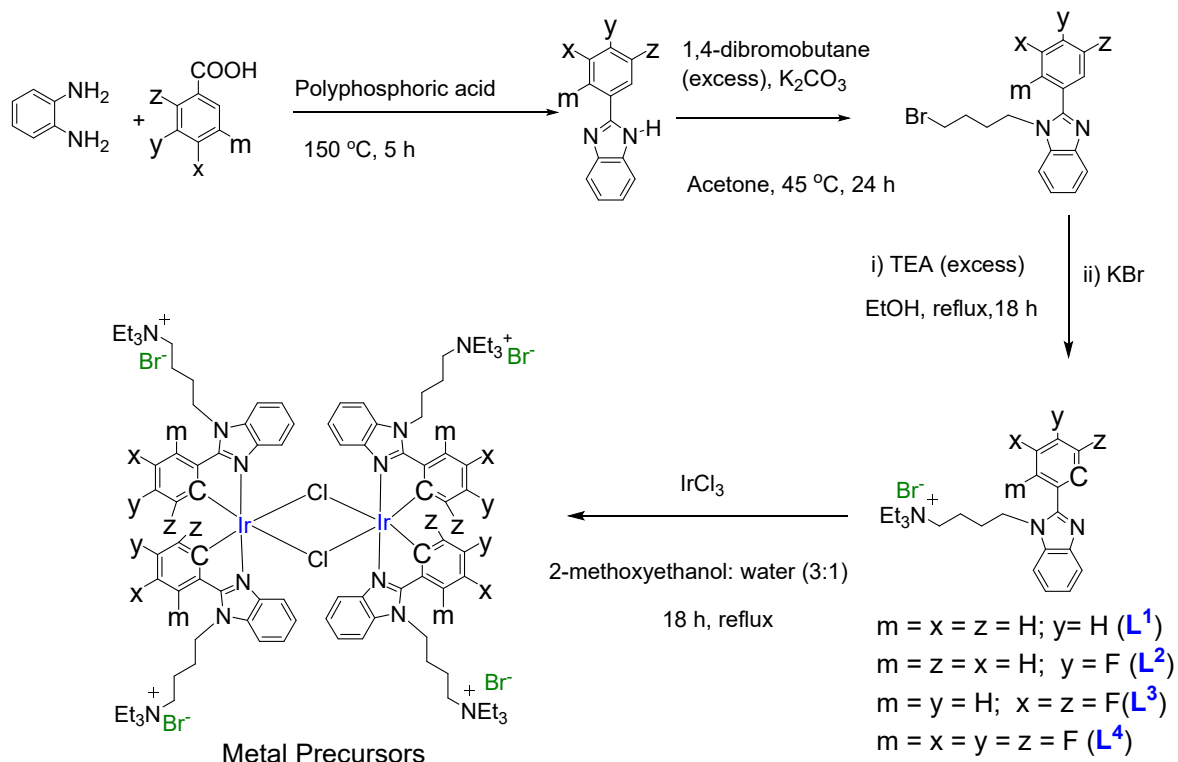

**Scheme S2.** Synthetic scheme for the preparation of complexes

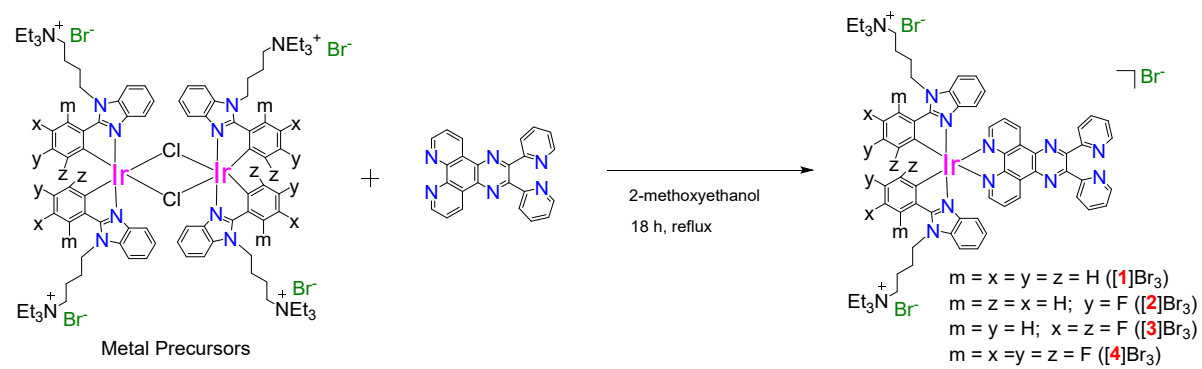

Figure S1.  $^1\text{H}$  NMR spectra of the ligands  $\text{L}^1 - \text{L}^4$  in  $(\text{CD}_3)_2\text{SO}$ .

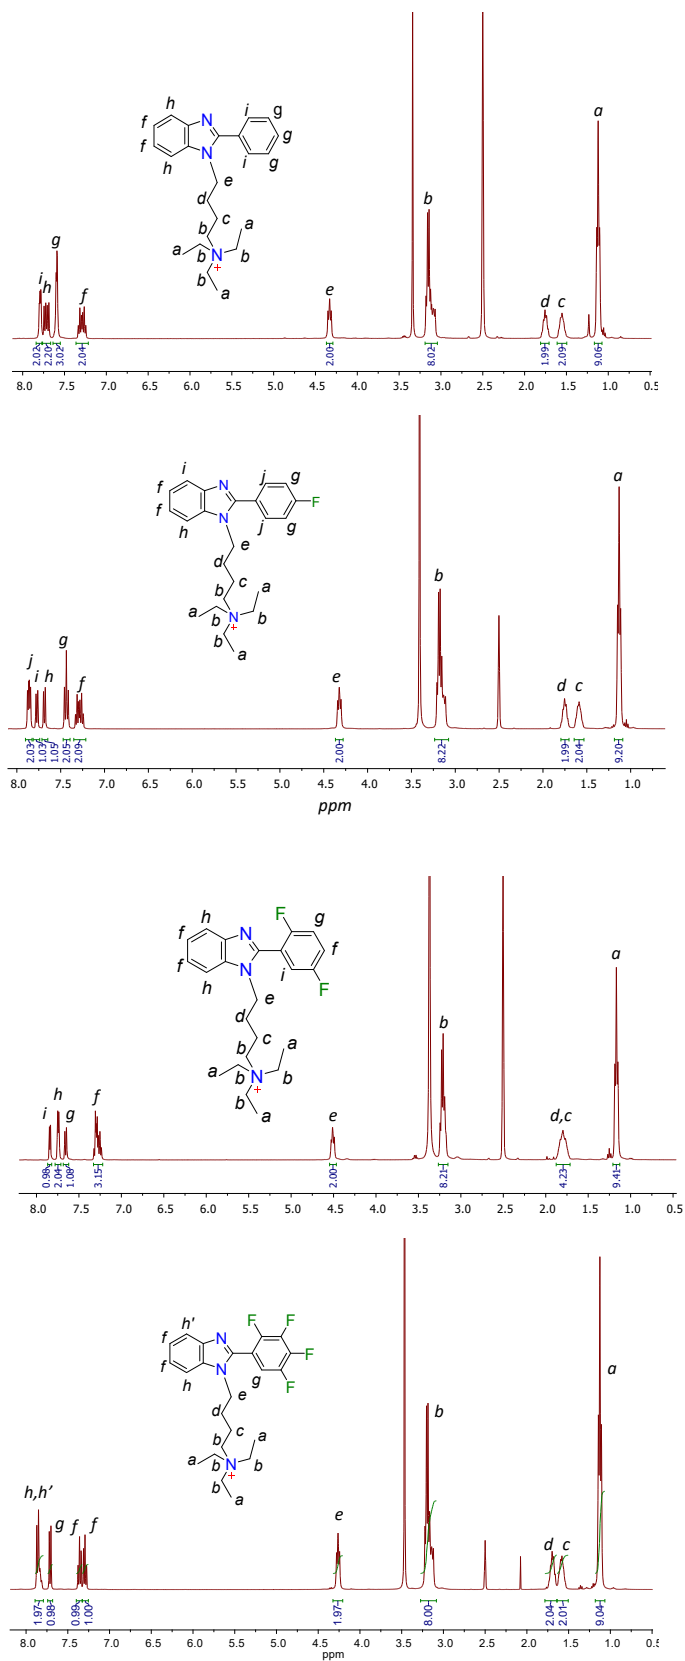

**Figure S2.** Experimental (blue) and simulated (red) high-resolution mass spectra (HRMS) of the complexes  $[1]^{3+}$  -  $[4]^{3+}$ .

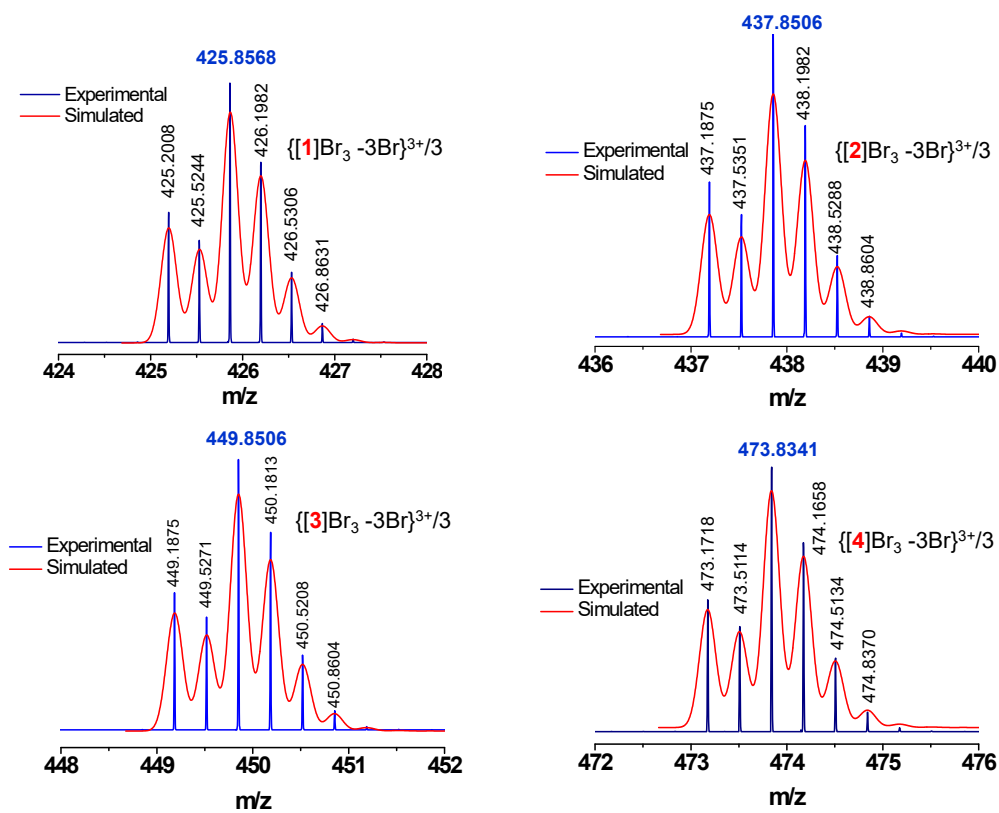

Figure S3.  $^1\text{H}$  NMR spectra of the complexes  $[1]^{3+}$  –  $[4]^{3+}$  in  $(\text{CD}_3)_2\text{SO}$ .

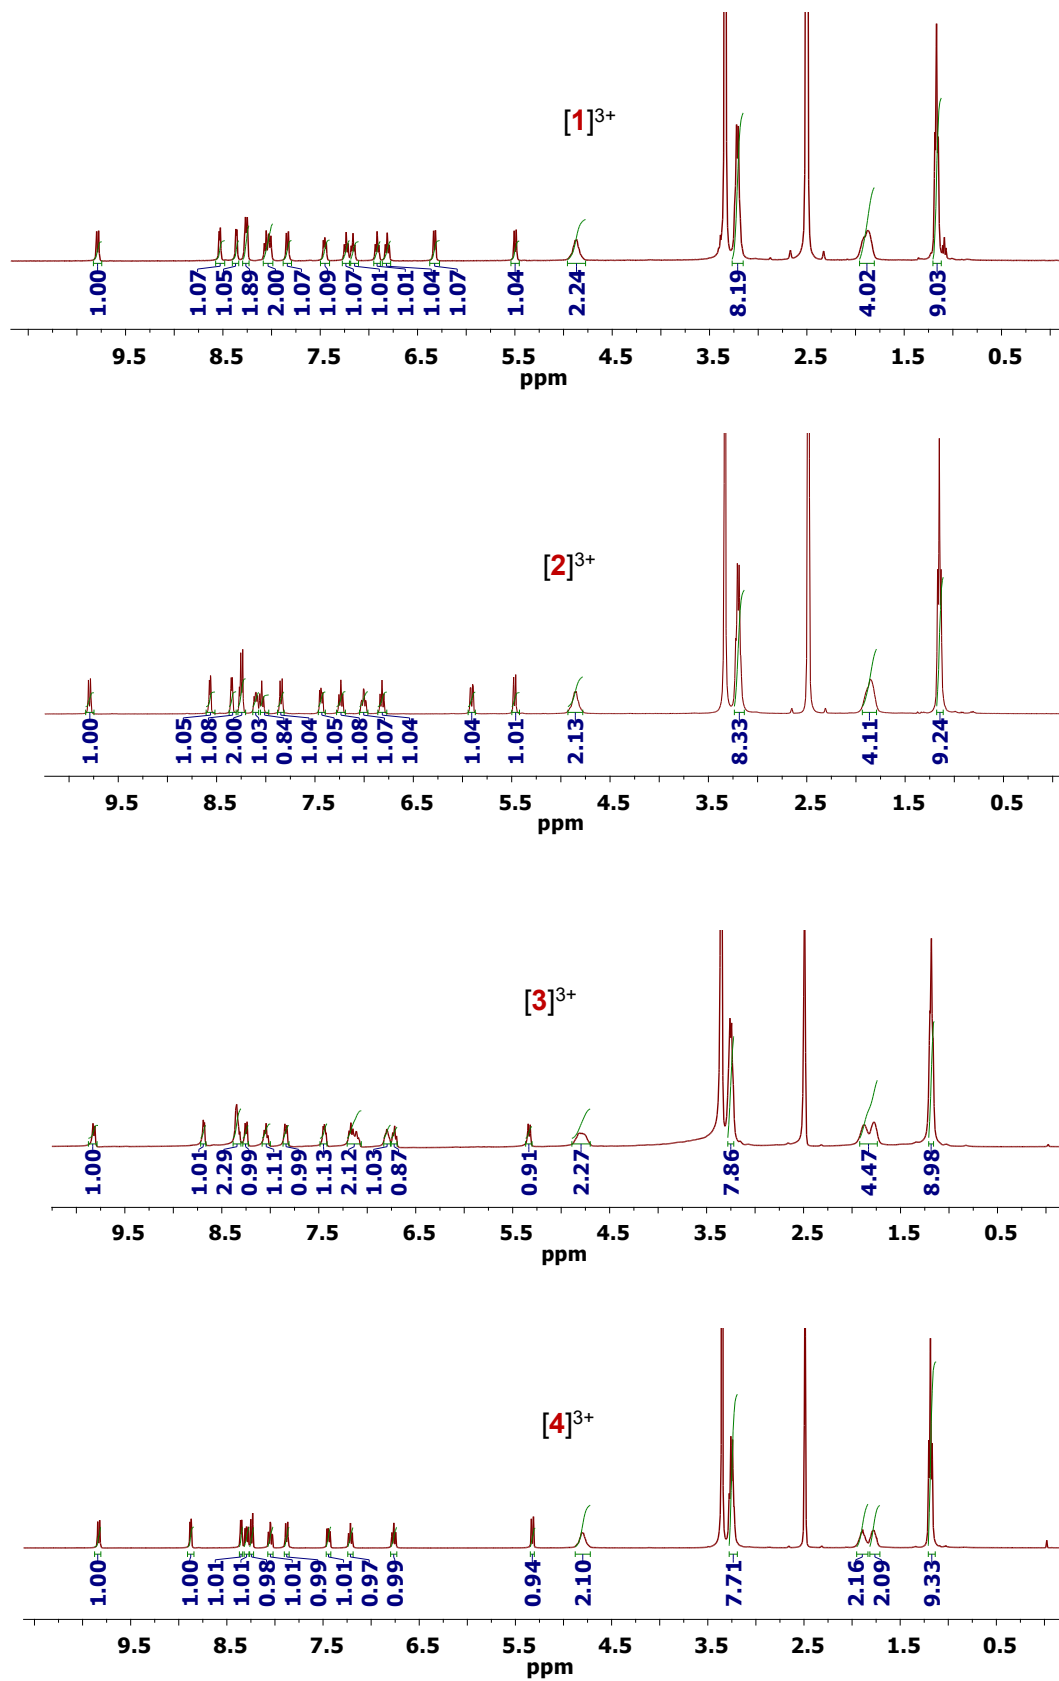

**Figure S4.**  $^{13}\text{C}\{^1\text{H}\}$  NMR spectra of the complexes  $[\mathbf{1}]^{3+}$  –  $[\mathbf{4}]^{3+}$  in  $(\text{CD}_3)_2\text{SO}$ .

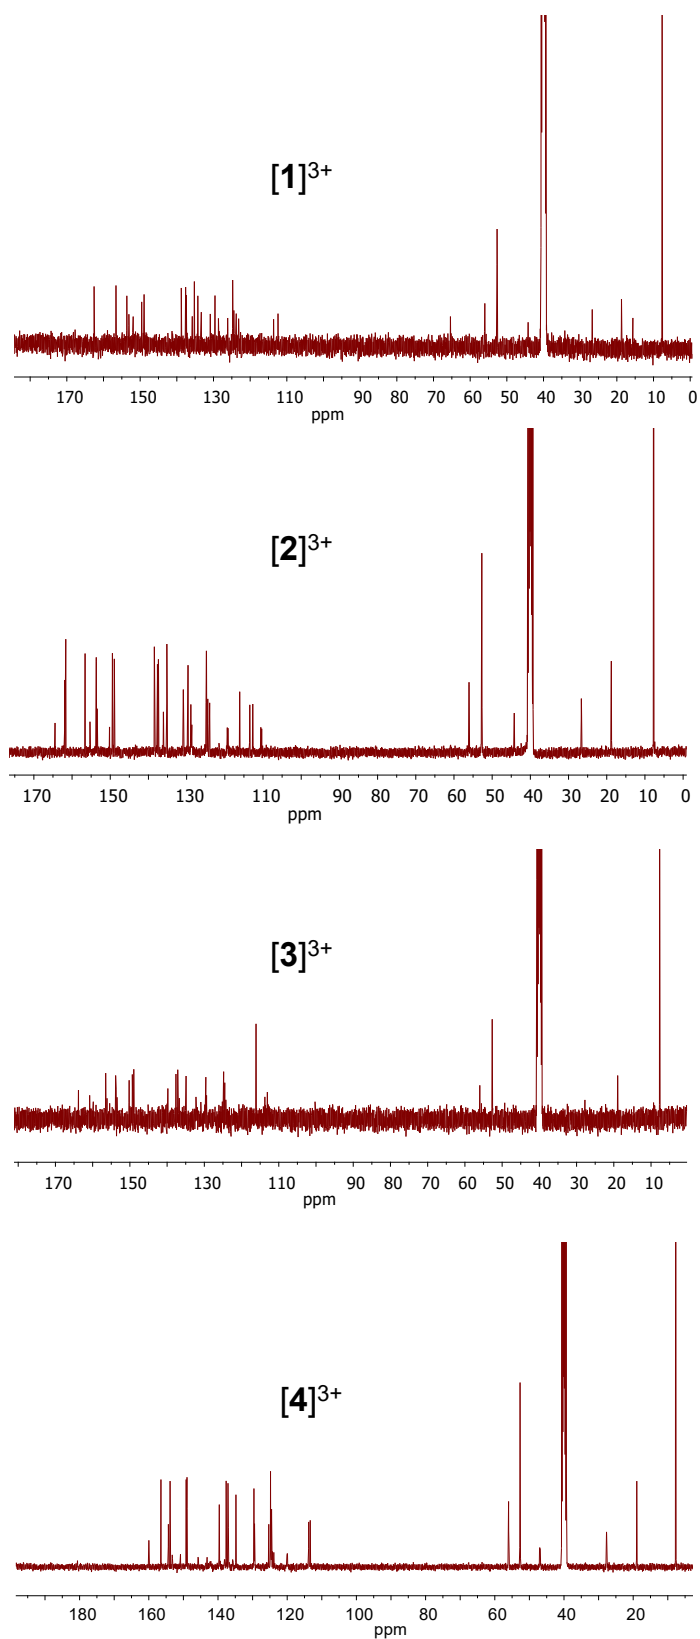



Figure S5.  $^{19}\text{F}$  NMR spectra of the complexes  $[\mathbf{2}]^{3+}$  –  $[\mathbf{4}]^{3+}$  in  $(\text{CD}_3)_2\text{SO}$ .

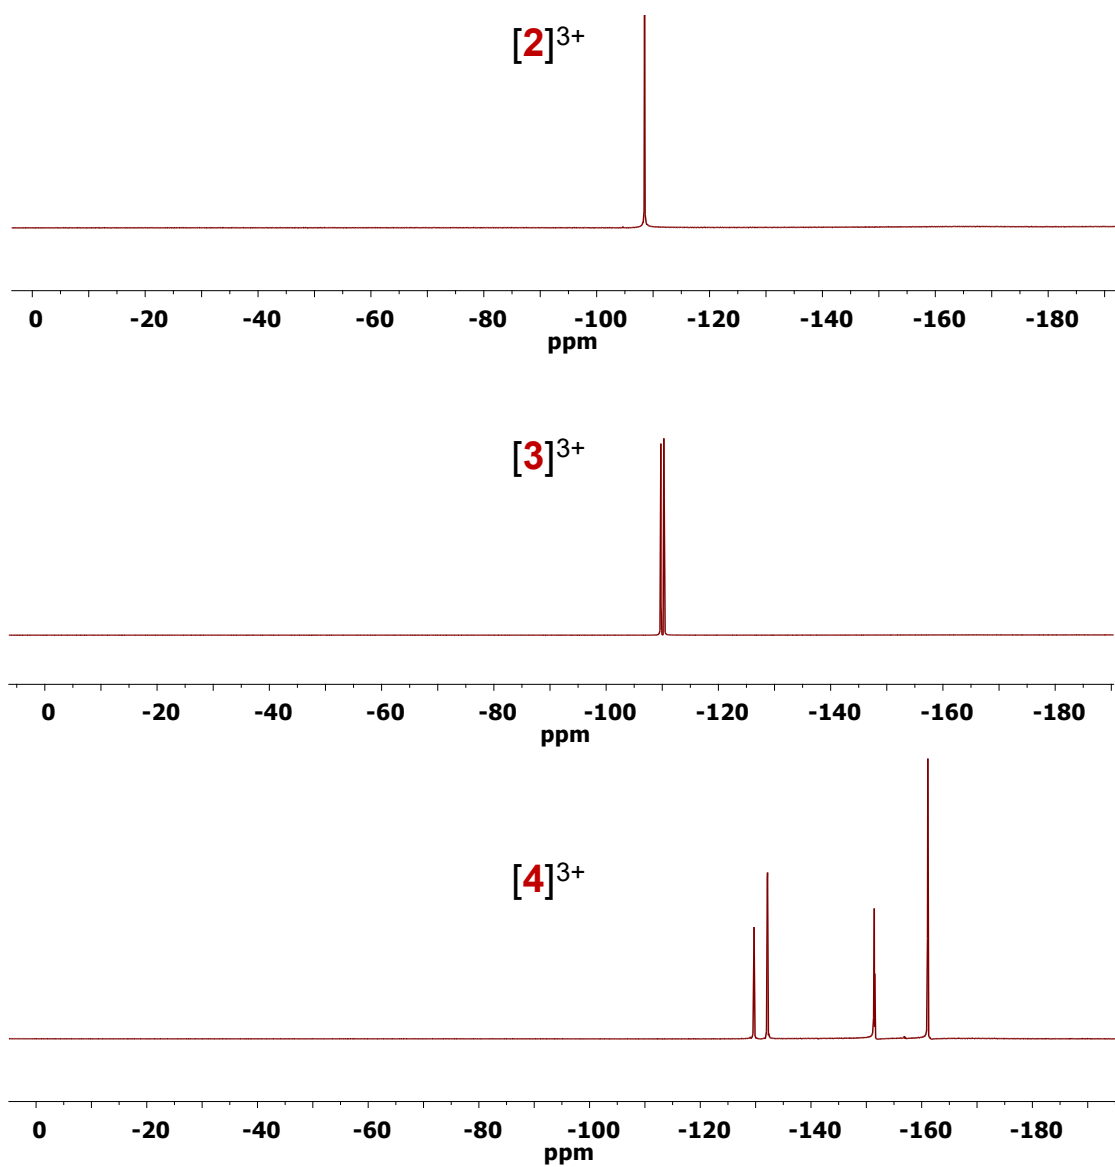

Figure S6.  $^1\text{H}$ - $^1\text{H}$  COSY spectra of complex  $[1]^{3+}$  in  $(\text{CD}_3)_2\text{SO}$ .

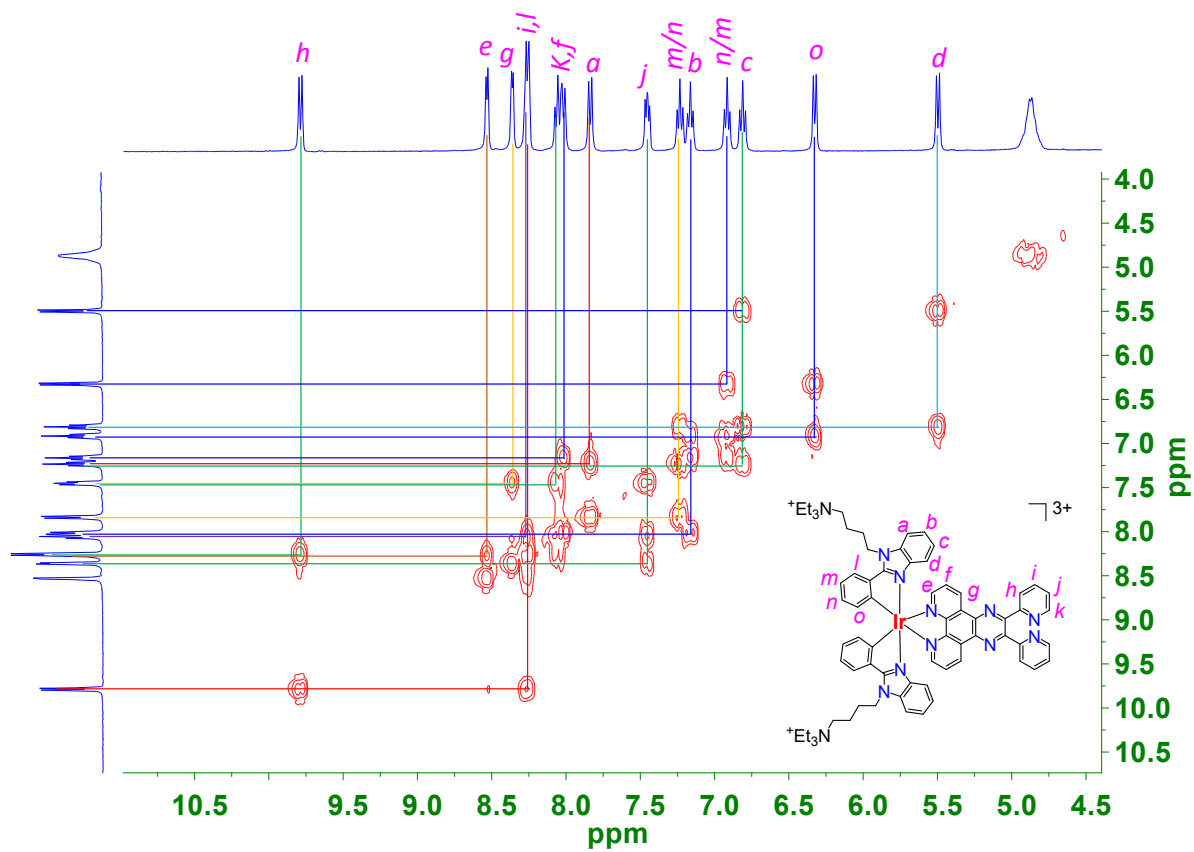

**Table S1.** B3LYP optimised coordinates of complex [1]<sup>3+</sup> in gas phase.

| Center Number | Atomic Number | Coordinates (Å) |          |          |    |   |          |          |          |
|---------------|---------------|-----------------|----------|----------|----|---|----------|----------|----------|
|               |               | X               | Y        | Z        |    |   |          |          |          |
|               |               |                 |          |          | 43 | 6 | -2.2346  | -2.7431  | 0.713649 |
|               |               |                 |          |          | 44 | 6 | -2.65524 | -2.03904 | -0.48613 |
| 1             | 77            | 0.000659        | -0.94071 | 0.015312 | 45 | 6 | -1.99872 | 0.442265 | -2.98927 |
| 2             | 7             | 1.828125        | -1.11524 | 1.003288 | 46 | 1 | -1.04633 | 0.93843  | -2.85587 |
| 3             | 7             | -1.82755        | -1.10234 | -0.9735  | 47 | 6 | -4.86148 | -3.12182 | -1.21388 |
| 4             | 7             | -0.81786        | 0.81527  | 1.089588 | 48 | 6 | -1.65272 | 0.789859 | 2.132051 |
| 5             | 7             | 0.833562        | 0.805861 | -1.06329 | 49 | 1 | -1.92014 | -0.1941  | 2.501707 |
| 6             | 7             | 3.77727         | -2.16377 | 1.297713 | 50 | 6 | -2.14624 | 1.958539 | 2.72892  |
| 7             | 7             | -3.78338        | -2.13819 | -1.26866 | 51 | 1 | -2.81881 | 1.882428 | 3.576792 |
| 8             | 7             | 0.959614        | 5.643955 | -1.02795 | 52 | 6 | -1.7605  | 3.190687 | 2.228902 |
| 9             | 7             | -0.9147         | 5.653808 | 1.034107 | 53 | 1 | -2.11704 | 4.122138 | 2.654632 |
| 10            | 7             | -1.47619        | 8.901599 | -0.06542 | 54 | 6 | -0.8801  | 3.240603 | 1.131906 |
| 11            | 7             | 1.535613        | 8.895399 | 0.055392 | 55 | 6 | -0.43554 | 2.019756 | 0.581012 |
| 12            | 6             | 0.906636        | -2.38217 | -1.09251 | 56 | 6 | 0.459075 | 2.014698 | -0.55929 |
| 13            | 6             | -0.91919        | -2.36989 | 1.127732 | 57 | 6 | 1.668557 | 0.771054 | -2.10537 |
| 14            | 6             | 0.404593        | -2.99231 | -2.2524  | 58 | 1 | 1.929415 | -0.21605 | -2.47134 |
| 15            | 1             | -0.58521        | -2.72861 | -2.61162 | 59 | 6 | 2.169917 | 1.934187 | -2.70648 |
| 16            | 6             | 1.150924        | -3.92645 | -2.97437 | 60 | 1 | 2.842305 | 1.850526 | -3.55379 |
| 17            | 1             | 0.730475        | -4.37754 | -3.86945 | 61 | 6 | 1.791815 | 3.170714 | -2.21143 |
| 18            | 6             | 2.43899         | -4.27831 | -2.56116 | 62 | 1 | 2.154349 | 4.098206 | -2.64073 |
| 19            | 1             | 3.021469        | -4.99661 | -3.13016 | 63 | 6 | 0.911437 | 3.230544 | -1.11493 |
| 20            | 6             | 2.973671        | -3.69475 | -1.41781 | 64 | 6 | 0.466952 | 4.48977  | -0.53637 |
| 21            | 1             | 3.984038        | -3.95847 | -1.12581 | 65 | 6 | -0.42833 | 4.494695 | 0.547858 |
| 22            | 6             | 2.218273        | -2.76707 | -0.67716 | 66 | 6 | -0.4942  | 6.794226 | 0.502101 |
| 23            | 6             | 2.647329        | -2.06059 | 0.518385 | 67 | 6 | 0.545091 | 6.789112 | -0.50141 |
| 24            | 6             | 2.43029         | -0.56405 | 2.125472 | 68 | 6 | 1.264857 | 8.019113 | -0.92482 |
| 25            | 6             | 2.017042        | 0.438787 | 3.010224 | 69 | 6 | 1.683674 | 8.19118  | -2.2487  |
| 26            | 1             | 1.067616        | 0.940819 | 2.877483 | 70 | 1 | 1.445432 | 7.444432 | -2.99807 |
| 27            | 6             | 2.862144        | 0.76094  | 4.067598 | 71 | 6 | 2.393537 | 9.346394 | -2.57161 |
| 28            | 1             | 2.566604        | 1.535373 | 4.768479 | 72 | 1 | 2.719565 | 9.525792 | -3.59202 |
| 29            | 6             | 4.092663        | 0.103207 | 4.252335 | 73 | 6 | 2.67478  | 10.26605 | -1.56232 |
| 30            | 1             | 4.724934        | 0.380453 | 5.089844 | 74 | 1 | 3.225308 | 11.17846 | -1.76855 |
| 31            | 6             | 4.514465        | -0.89828 | 3.380952 | 75 | 6 | 2.230943 | 9.988449 | -0.26544 |
| 32            | 1             | 5.46485         | -1.40066 | 3.531871 | 76 | 1 | 2.444001 | 10.6761  | 0.550398 |
| 33            | 6             | 3.665101        | -1.21755 | 2.31994  | 77 | 6 | -1.2078  | 8.02988  | 0.919502 |
| 34            | 6             | 4.849167        | -3.15398 | 1.241342 | 78 | 6 | -1.62391 | 8.211385 | 2.242957 |
| 35            | 6             | -0.42404        | -2.97944 | 2.290811 | 79 | 1 | -1.3878  | 7.467965 | 2.996305 |
| 36            | 1             | 0.56847         | -2.72449 | 2.64892  | 80 | 6 | -2.3283  | 9.371504 | 2.560198 |
| 37            | 6             | -1.18104        | -3.90135 | 3.017477 | 81 | 1 | -2.65205 | 9.558218 | 3.580024 |
| 38            | 1             | -0.7659         | -4.35228 | 3.915122 | 82 | 6 | -2.60709 | 10.2865  | 1.545979 |
| 39            | 6             | -2.47318        | -4.24057 | 2.606243 | 83 | 1 | -3.1534  | 11.20244 | 1.747714 |
| 40            | 1             | -3.06431        | -4.94831 | 3.179486 | 84 | 6 | -2.16637 | 9.999472 | 0.250097 |
| 41            | 6             | -3.00104        | -3.65748 | 1.459495 | 85 | 1 | -2.37765 | 10.6833  | -0.56941 |
| 42            | 1             | -4.01495        | -3.91005 | 1.169804 | 86 | 6 | -2.42206 | -0.55271 | -2.10047 |
|               |               |                 |          |          | 87 | 6 | -2.83772 | 0.764428 | -4.05155 |

|     |   |          |          |          |     |   |          |          |          |
|-----|---|----------|----------|----------|-----|---|----------|----------|----------|
| 88  | 1 | -2.53424 | 1.53292  | -4.75557 | 128 | 1 | -11.3787 | -5.87065 | 1.786838 |
| 89  | 6 | -4.07199 | 0.114166 | -4.23725 | 129 | 1 | -10.2116 | -7.18002 | 1.651976 |
| 90  | 6 | -3.66082 | -1.19843 | -2.29558 | 130 | 1 | 9.491728 | -4.65693 | 1.730084 |
| 91  | 6 | -4.50387 | -0.87936 | -3.36164 | 131 | 1 | 10.33522 | -3.13238 | 1.449862 |
| 92  | 1 | -5.45692 | -1.37644 | -3.51333 | 132 | 6 | 11.58932 | -4.8893  | 1.277295 |
| 93  | 1 | -4.46489 | -4.04944 | -0.79597 | 133 | 1 | 10.18697 | -3.47656 | -2.24899 |
| 94  | 1 | -5.1402  | -3.34102 | -2.25015 | 134 | 1 | 11.4962  | -4.25575 | -1.36315 |
| 95  | 6 | -6.09662 | -2.63839 | -0.43166 | 135 | 6 | 11.25983 | -2.14865 | -0.92551 |
| 96  | 1 | 4.441978 | -4.08413 | 0.839276 | 136 | 1 | 10.50058 | -1.36266 | -0.89509 |
| 97  | 1 | 5.139628 | -3.36283 | 2.276403 | 137 | 1 | 11.96699 | -1.877   | -1.71605 |
| 98  | 6 | 6.076919 | -2.68722 | 0.437763 | 138 | 1 | 11.81563 | -2.14523 | 0.015516 |
| 99  | 1 | 5.785539 | -2.51281 | -0.60557 | 139 | 1 | 11.54577 | -5.94667 | 1.004385 |
| 100 | 6 | 7.22123  | -3.71974 | 0.507034 | 140 | 1 | 11.85271 | -4.84629 | 2.339203 |
| 101 | 1 | 6.415815 | -1.72311 | 0.836714 | 141 | 1 | 12.40319 | -4.41163 | 0.726268 |
| 102 | 1 | -5.82173 | -2.46755 | 0.616642 | 142 | 1 | 8.724616 | -5.96993 | 0.042562 |
| 103 | 6 | -7.25389 | -3.65464 | -0.5223  | 143 | 1 | 10.28903 | -6.07823 | -0.75868 |
| 104 | 1 | -6.41492 | -1.66969 | -0.83676 | 144 | 6 | 8.649315 | -5.67977 | -2.10443 |
| 105 | 1 | -6.91694 | -4.61835 | -0.12351 | 145 | 1 | 7.67668  | -5.18161 | -2.14327 |
| 106 | 1 | -7.50414 | -3.81306 | -1.57759 | 146 | 1 | 8.472958 | -6.74777 | -2.26849 |
| 107 | 6 | -8.47127 | -3.13914 | 0.253806 | 147 | 1 | 9.262329 | -5.32811 | -2.93796 |
| 108 | 1 | 6.862283 | -4.68036 | 0.119672 | 148 | 1 | -9.42828 | -4.98027 | -1.62027 |
| 109 | 1 | 7.491404 | -3.8777  | 1.557389 | 149 | 6 | -10.4034 | -3.10616 | -2.10284 |
| 110 | 6 | 8.427935 | -3.22463 | -0.29842 | 150 | 1 | -11.1068 | -4.88271 | -1.09923 |
| 111 | 1 | -8.2128  | -3.01012 | 1.306131 | 151 | 6 | -10.6479 | -2.99661 | 2.447043 |
| 112 | 7 | -9.72694 | -4.01444 | 0.237437 | 152 | 1 | -11.7573 | -3.85685 | 0.798853 |
| 113 | 1 | -8.7798  | -2.1649  | -0.13179 | 153 | 1 | -10.9774 | -2.32227 | 0.421416 |
| 114 | 1 | 8.152468 | -3.08748 | -1.34645 | 154 | 1 | -9.49423 | -2.52274 | -2.27218 |
| 115 | 7 | 9.674233 | -4.11394 | -0.30231 | 155 | 1 | -11.1928 | -2.43884 | -1.74787 |
| 116 | 1 | 8.756527 | -2.25689 | 0.08479  | 156 | 1 | -10.7268 | -3.48959 | -3.07604 |
| 117 | 6 | 9.339727 | -5.54182 | -0.75159 | 157 | 1 | -10.5588 | -3.91019 | 3.040483 |
| 118 | 6 | 10.25339 | -4.16982 | 1.11935  | 158 | 1 | -11.5375 | -2.46785 | 2.804663 |
| 119 | 6 | 10.69493 | -3.51869 | -1.28463 | 159 | 1 | -9.79056 | -2.35074 | 2.654311 |
| 120 | 1 | -4.69912 | 0.390964 | -5.07877 |     |   |          |          |          |
| 121 | 6 | -9.41866 | -5.34415 | 0.940231 |     |   |          |          |          |
| 122 | 6 | -10.1823 | -4.3131  | -1.19751 |     |   |          |          |          |
| 123 | 6 | -10.8559 | -3.26299 | 0.960159 |     |   |          |          |          |
| 124 | 1 | -8.65284 | -5.82863 | 0.332334 |     |   |          |          |          |
| 125 | 6 | -10.5984 | -6.28926 | 1.146275 |     |   |          |          |          |
| 126 | 1 | -8.96724 | -5.07868 | 1.898366 |     |   |          |          |          |
| 127 | 1 | -11.0492 | -6.62695 | 0.209711 |     |   |          |          |          |

**Table S2.** B3LYP optimised coordinates of complex [2]<sup>3+</sup> in gas phase.

| Center Number | Atomic Number | Coordinates (Å) |           |           |    |   |           |           |           |
|---------------|---------------|-----------------|-----------|-----------|----|---|-----------|-----------|-----------|
|               |               | X               | Y         | Z         |    |   |           |           |           |
|               |               |                 |           |           | 42 | 6 | 2.830534  | -1.611988 | 0.469115  |
|               |               |                 |           |           | 43 | 6 | 1.97564   | 0.816627  | 2.962825  |
| 1             | 77            | 0.082774        | -0.766205 | -0.02147  | 44 | 1 | 0.992316  | 1.245892  | 2.821884  |
| 2             | 7             | -1.729921       | -1.140914 | -0.985663 | 45 | 6 | 5.096939  | -2.541311 | 1.216383  |
| 3             | 7             | 1.928809        | -0.743623 | 0.950567  | 46 | 6 | 1.485366  | 1.12973   | -2.171449 |
| 4             | 7             | 0.67637         | 1.060962  | -1.110512 | 47 | 1 | 1.859986  | 0.183404  | -2.545709 |
| 5             | 7             | -0.911998       | 0.868909  | 1.080021  | 48 | 6 | 1.824347  | 2.345524  | -2.781833 |
| 6             | 7             | -3.539089       | -2.418365 | -1.27101  | 49 | 1 | 2.48268   | 2.34468   | -3.644124 |
| 7             | 7             | 3.957945        | -1.626202 | 1.256279  | 50 | 6 | 1.308418  | 3.526217  | -2.275278 |
| 8             | 7             | -1.591935       | 5.660823  | 1.049712  | 51 | 1 | 1.5438    | 4.491124  | -2.710594 |
| 9             | 7             | 0.213781        | 5.878817  | -1.061837 | 52 | 6 | 0.45446   | 3.477553  | -1.157416 |
| 10            | 7             | 0.42546         | 9.172659  | 0.025686  | 53 | 6 | 0.168409  | 2.215583  | -0.594574 |
| 11            | 7             | -2.565538       | 8.818962  | -0.025452 | 54 | 6 | -0.690631 | 2.111661  | 0.56757   |
| 12            | 6             | -0.637032       | -2.303901 | 1.088973  | 55 | 6 | -1.708134 | 0.742039  | 2.145307  |
| 13            | 6             | 1.136426        | -2.089557 | -1.153672 | 56 | 1 | -1.846466 | -0.267139 | 2.517283  |
| 14            | 6             | -0.045688       | -2.854243 | 2.232917  | 57 | 6 | -2.320357 | 1.842106  | 2.761956  |
| 15            | 1             | 0.908603        | -2.499407 | 2.605855  | 58 | 1 | -2.954455 | 1.684381  | 3.627981  |
| 16            | 6             | -0.682276       | -3.872582 | 2.935541  | 59 | 6 | -2.09966  | 3.112373  | 2.257308  |
| 17            | 6             | -1.923747       | -4.382219 | 2.561693  | 60 | 1 | -2.553307 | 3.99352   | 2.697507  |
| 18            | 1             | -2.386255       | -5.165573 | 3.151528  | 61 | 6 | -1.263079 | 3.269472  | 1.136334  |
| 19            | 6             | -2.533008       | -3.850405 | 1.431733  | 62 | 6 | -0.982541 | 4.569351  | 0.545707  |
| 20            | 1             | -3.511769       | -4.227035 | 1.157615  | 63 | 6 | -0.123586 | 4.673261  | -0.562567 |
| 21            | 6             | -1.902376       | -2.837644 | 0.685862  | 64 | 6 | -0.320077 | 6.965247  | -0.518862 |
| 22            | 6             | -2.424515       | -2.181512 | -0.499138 | 65 | 6 | -1.32651  | 6.843984  | 0.51127   |
| 23            | 6             | -2.404904       | -0.66083  | -2.100143 | 66 | 6 | -2.173105 | 7.984409  | 0.950042  |
| 24            | 6             | -2.128981       | 0.391084  | -2.982186 | 67 | 6 | -2.577854 | 8.113623  | 2.283117  |
| 25            | 1             | -1.250842       | 1.011005  | -2.856076 | 68 | 1 | -2.238258 | 7.402824  | 3.028361  |
| 26            | 6             | -3.01756        | 0.610067  | -4.03067  | 69 | 6 | -3.407274 | 9.181978  | 2.620254  |
| 27            | 1             | -2.827389       | 1.419652  | -4.728333 | 70 | 1 | -3.727477 | 9.328129  | 3.647778  |
| 28            | 6             | -4.157115       | -0.195548 | -4.210671 | 71 | 6 | -3.815503 | 10.058406 | 1.615946  |
| 29            | 1             | -4.825559       | 0.004021  | -5.042122 | 72 | 1 | -4.461518 | 10.903088 | 1.833372  |
| 30            | 6             | -4.442757       | -1.245645 | -3.341145 | 73 | 6 | -3.373837 | 9.826762  | 0.309321  |
| 31            | 1             | -5.323191       | -1.863532 | -3.488031 | 74 | 1 | -3.683848 | 10.481197 | -0.502749 |
| 32            | 6             | -3.551311       | -1.460426 | -2.288746 | 75 | 6 | 0.237767  | 8.272971  | -0.952792 |
| 33            | 6             | -4.489691       | -3.525425 | -1.211585 | 76 | 6 | 0.601857  | 8.496924  | -2.285045 |
| 34            | 6             | 0.707657        | -2.729131 | -2.328161 | 77 | 1 | 0.436463  | 7.72926   | -3.032884 |
| 35            | 1             | -0.300755       | -2.561247 | -2.692414 | 78 | 6 | 1.162018  | 9.729083  | -2.61789  |
| 36            | 6             | 1.544373        | -3.569708 | -3.066336 | 79 | 1 | 1.440509  | 9.948573  | -3.644515 |
| 37            | 1             | 1.205596        | -4.055454 | -3.976091 | 80 | 6 | 1.356194  | 10.672803 | -1.610314 |
| 38            | 6             | 2.847907        | -3.776582 | -2.62691  | 81 | 1 | 1.789953  | 11.644487 | -1.824244 |
| 39            | 6             | 3.333729        | -3.174505 | -1.47846  | 82 | 6 | 0.978988  | 10.341166 | -0.304973 |
| 40            | 1             | 4.367456        | -3.354145 | -1.212452 | 83 | 1 | 1.128438  | 11.046942 | 0.50949   |
| 41            | 6             | 2.476128        | -2.343946 | -0.735098 | 84 | 6 | 2.475028  | -0.148119 | 2.079411  |

|     |   |            |           |           |     |   |            |           |           |
|-----|---|------------|-----------|-----------|-----|---|------------|-----------|-----------|
| 85  | 6 | 2.782763   | 1.200173  | 4.028887  | 130 | 6 | -11.012303 | -5.916532 | -1.427469 |
| 86  | 1 | 2.420793   | 1.946697  | 4.728837  | 131 | 1 | -9.885734  | -4.334571 | 2.126781  |
| 87  | 6 | 4.059635   | 0.640496  | 4.224348  | 132 | 1 | -11.080678 | -5.245421 | 1.205032  |
| 88  | 6 | 3.757923   | -0.699168 | 2.282064  | 133 | 6 | -11.026489 | -3.130951 | 0.741974  |
| 89  | 6 | 4.568795   | -0.31899  | 3.353136  | 134 | 1 | -10.342916 | -2.277918 | 0.724699  |
| 90  | 1 | 5.554544   | -0.745391 | 3.511035  | 135 | 1 | -11.785112 | -2.915368 | 1.501406  |
| 91  | 1 | 4.765328   | -3.488949 | 0.78701   | 136 | 1 | -11.543871 | -3.193516 | -0.218686 |
| 92  | 1 | 5.369026   | -2.749781 | 2.256593  | 137 | 1 | -10.879314 | -6.963034 | -1.142266 |
| 93  | 6 | 6.314593   | -1.980592 | 0.458961  | 138 | 1 | -11.239006 | -5.906417 | -2.498656 |
| 94  | 1 | -3.984497  | -4.397305 | -0.791414 | 139 | 1 | -11.887675 | -5.514389 | -0.911668 |
| 95  | 1 | -4.740688  | -3.780452 | -2.24681  | 140 | 1 | -8.109499  | -6.707761 | -0.069648 |
| 96  | 6 | -5.773094  | -3.187719 | -0.430303 | 141 | 1 | -9.684683  | -6.952482 | 0.679483  |
| 97  | 1 | -5.520377  | -2.983537 | 0.617813  | 142 | 6 | -8.140411  | -6.38286  | 2.073715  |
| 98  | 6 | -6.808596  | -4.328483 | -0.519257 | 143 | 1 | -7.218551  | -5.79817  | 2.138301  |
| 99  | 1 | -6.19948   | -2.262729 | -0.837737 | 144 | 1 | -7.874755  | -7.427843 | 2.263674  |
| 100 | 1 | 6.042768   | -1.797991 | -0.588114 | 145 | 1 | -8.812984  | -6.075733 | 2.878446  |
| 101 | 6 | 7.515733   | -2.945739 | 0.538233  | 146 | 1 | 9.718344   | -4.220745 | 1.615886  |
| 102 | 1 | 6.583154   | -1.007814 | 0.8894    | 147 | 6 | 10.628404  | -2.335445 | 2.177316  |
| 103 | 1 | 7.227993   | -3.911075 | 0.106659  | 148 | 1 | 11.399175  | -4.051953 | 1.120685  |
| 104 | 1 | 7.758759   | -3.12363  | 1.592065  | 149 | 6 | 10.918504  | -2.045802 | -2.358789 |
| 105 | 6 | 8.719577   | -2.354808 | -0.204433 | 150 | 1 | 12.039449  | -2.918972 | -0.72496  |
| 106 | 1 | -6.372936  | -5.245353 | -0.105378 | 151 | 1 | 11.190859  | -1.432645 | -0.305409 |
| 107 | 1 | -7.026313  | -4.524169 | -1.575342 | 152 | 1 | 9.700775   | -1.783384 | 2.351808  |
| 108 | 6 | -8.08422   | -3.940908 | 0.237853  | 153 | 1 | 11.404134  | -1.634777 | 1.858468  |
| 109 | 1 | 8.467786   | -2.200083 | -1.254945 | 154 | 1 | 10.9473    | -2.743706 | 3.141861  |
| 110 | 7 | 10.008571  | -3.180356 | -0.202168 | 155 | 1 | 10.872045  | -2.940339 | -2.985273 |
| 111 | 1 | 8.984426   | -1.383324 | 0.218512  | 156 | 1 | 11.791766  | -1.471198 | -2.684467 |
| 112 | 1 | -7.860056  | -3.766739 | 1.292698  | 157 | 1 | 10.039669  | -1.426054 | -2.555603 |
| 113 | 7 | -9.240428  | -4.944944 | 0.210971  | 158 | 9 | 3.673787   | -4.570234 | -3.338704 |
| 114 | 1 | -8.48932   | -3.013484 | -0.170833 | 159 | 9 | -0.082805  | -4.376431 | 4.026442  |
| 115 | 6 | -8.790194  | -6.328682 | 0.695273  |     |   |            |           |           |
| 116 | 6 | -9.756696  | -5.073081 | -1.229956 |     |   |            |           |           |
| 117 | 6 | -10.350123 | -4.43674  | 1.145167  |     |   |            |           |           |
| 118 | 1 | 4.658931   | 0.963107  | 5.06977   |     |   |            |           |           |
| 119 | 6 | 9.763327   | -4.493113 | -0.959514 |     |   |            |           |           |
| 120 | 6 | 10.455791  | -3.515591 | 1.227014  |     |   |            |           |           |
| 121 | 6 | 11.116445  | -2.357287 | -0.879236 |     |   |            |           |           |
| 122 | 1 | 9.012695   | -5.032581 | -0.3797   |     |   |            |           |           |
| 123 | 6 | 10.98229   | -5.381177 | -1.188894 |     |   |            |           |           |
| 124 | 1 | 9.310512   | -4.208916 | -1.911476 |     |   |            |           |           |
| 125 | 1 | 11.442076  | -5.731922 | -0.261557 |     |   |            |           |           |
| 126 | 1 | 11.747719  | -4.910649 | -1.81082  |     |   |            |           |           |
| 127 | 1 | 10.634315  | -6.269453 | -1.72625  |     |   |            |           |           |
| 128 | 1 | -8.929971  | -5.494678 | -1.803653 |     |   |            |           |           |
| 129 | 1 | -9.921617  | -4.052002 | -1.579743 |     |   |            |           |           |

**Table S3.** B3LYP optimised coordinates of complex [3]<sup>3+</sup> in gas phase.

| Center Number | Atomic Number | Coordinates (Å) |           |           |    |   |           |           |           |
|---------------|---------------|-----------------|-----------|-----------|----|---|-----------|-----------|-----------|
|               |               | X               | Y         | Z         |    |   |           |           |           |
|               |               |                 |           |           | 42 | 1 | 1.121809  | 1.18487   | 2.743623  |
|               |               |                 |           |           | 43 | 6 | 5.067392  | -2.725514 | 1.088914  |
| 1             | 77            | 0.051352        | -0.807593 | -0.001899 | 44 | 6 | 1.525224  | 0.963646  | -2.192205 |
| 2             | 7             | -1.848522       | -0.967829 | -0.839679 | 45 | 1 | 1.818549  | -0.008406 | -2.572238 |
| 3             | 7             | 1.957699        | -0.822216 | 0.834559  | 46 | 6 | 1.937077  | 2.149653  | -2.816247 |
| 4             | 7             | 0.741347        | 0.959164  | -1.110714 | 47 | 1 | 2.570527  | 2.097633  | -3.695361 |
| 5             | 7             | -0.78612        | 0.886189  | 1.12206   | 48 | 6 | 1.521948  | 3.366743  | -2.302996 |
| 6             | 7             | -3.787878       | -2.043836 | -1.084793 | 49 | 1 | 1.8154    | 4.310167  | -2.750025 |
| 7             | 7             | 3.970357        | -1.753835 | 1.081441  | 50 | 6 | 0.696265  | 3.384818  | -1.16306  |
| 8             | 7             | -1.141829       | 5.712757  | 1.079129  | 51 | 6 | 0.335201  | 2.149077  | -0.586571 |
| 9             | 7             | 0.627094        | 5.796949  | -1.07323  | 52 | 6 | -0.496789 | 2.109381  | 0.597405  |
| 10            | 7             | 1.090053        | 9.070654  | -0.004124 | 53 | 6 | -1.561713 | 0.815606  | 2.207177  |
| 11            | 7             | -1.919665       | 8.923647  | -0.000336 | 54 | 1 | -1.758657 | -0.180169 | 2.587987  |
| 12            | 6             | -0.770711       | -2.291668 | 1.13526   | 55 | 6 | -2.082909 | 1.956837  | 2.832846  |
| 13            | 6             | 0.987991        | -2.211023 | -1.152357 | 56 | 1 | -2.704052 | 1.844752  | 3.715136  |
| 14            | 6             | -0.199015       | -2.971885 | 2.212529  | 57 | 6 | -1.790169 | 3.207936  | 2.316929  |
| 15            | 6             | -0.88145        | -3.874381 | 3.021132  | 58 | 1 | -2.172219 | 4.118753  | 2.764688  |
| 16            | 1             | -0.36187        | -4.352243 | 3.845083  | 59 | 6 | -0.973956 | 3.305128  | 1.17423   |
| 17            | 6             | -2.22704        | -4.130876 | 2.76985   | 60 | 6 | -0.619704 | 4.57996   | 0.568624  |
| 18            | 1             | -2.809724       | -4.800293 | 3.392242  | 61 | 6 | 0.21828   | 4.619818  | -0.559995 |
| 19            | 6             | -2.826231       | -3.495817 | 1.697014  | 62 | 6 | 0.181947  | 6.919799  | -0.524487 |
| 20            | 6             | -2.134193       | -2.622873 | 0.844267  | 63 | 6 | -0.808724 | 6.872388  | 0.527221  |
| 21            | 6             | -2.643513       | -1.918691 | -0.330183 | 64 | 6 | -1.567227 | 8.070013  | 0.973975  |
| 22            | 6             | -2.482884       | -0.425075 | -1.945823 | 65 | 6 | -1.937672 | 8.234219  | 2.313123  |
| 23            | 6             | -2.109145       | 0.57905   | -2.84762  | 66 | 1 | -1.633514 | 7.506437  | 3.057278  |
| 24            | 1             | -1.16633        | 1.098534  | -2.748837 | 67 | 6 | -2.686275 | 9.358557  | 2.65738   |
| 25            | 6             | -2.983881       | 0.880514  | -3.885516 | 68 | 1 | -2.977029 | 9.532209  | 3.68935   |
| 26            | 1             | -2.717442       | 1.655491  | -4.597397 | 69 | 6 | -3.052119 | 10.254867 | 1.654297  |
| 27            | 6             | -4.20666        | 0.199968  | -4.0388   | 70 | 1 | -3.635122 | 11.142851 | 1.877187  |
| 28            | 1             | -4.862248       | 0.459936  | -4.863833 | 71 | 6 | -2.651264 | 9.986077  | 0.341565  |
| 29            | 6             | -4.588339       | -0.802235 | -3.152225 | 72 | 1 | -2.930787 | 10.655355 | -0.469447 |
| 30            | 1             | -5.530055       | -1.326225 | -3.279155 | 73 | 6 | 0.820369  | 8.184039  | -0.975324 |
| 31            | 6             | -3.709404       | -1.0971   | -2.107033 | 74 | 6 | 1.172468  | 8.378568  | -2.315368 |
| 32            | 6             | -4.821615       | -3.082417 | -1.084924 | 75 | 1 | 0.938622  | 7.622726  | -3.05696  |
| 33            | 6             | 0.474379        | -2.924361 | -2.237604 | 76 | 6 | 1.810784  | 9.567668  | -2.663891 |
| 34            | 6             | 1.227452        | -3.765276 | -3.050074 | 77 | 1 | 2.083285  | 9.764701  | -3.696648 |
| 35            | 1             | 0.749101        | -4.274527 | -3.88018  | 78 | 6 | 2.090676  | 10.497831 | -1.663901 |
| 36            | 6             | 2.587557        | -3.921042 | -2.794514 | 79 | 1 | 2.587035  | 11.436206 | -1.890066 |
| 37            | 1             | 3.222047        | -4.539103 | -3.419362 | 80 | 6 | 1.71733   | 10.196662 | -0.35003  |
| 38            | 6             | 3.131878        | -3.251573 | -1.713424 | 81 | 1 | 1.931946  | 10.892239 | 0.458595  |
| 39            | 6             | 2.371531        | -2.440835 | -0.857678 | 82 | 6 | 2.547398  | -0.238947 | 1.944665  |
| 40            | 6             | 2.822436        | -1.708778 | 0.323194  | 83 | 6 | 2.94484   | 1.093467  | 3.889809  |
| 41            | 6             | 2.09855         | 0.7332    | 2.847034  | 84 | 1 | 2.620837  | 1.845583  | 4.602341  |

|     |   |            |           |           |     |   |            |           |           |
|-----|---|------------|-----------|-----------|-----|---|------------|-----------|-----------|
| 85  | 6 | 4.21245    | 0.501651  | 4.046718  | 130 | 1 | -11.585482 | -4.357671 | 1.091507  |
| 86  | 6 | 3.819043   | -0.820632 | 2.108077  | 131 | 6 | -11.468875 | -2.353341 | 0.280277  |
| 87  | 6 | 4.669603   | -0.4669   | 3.158341  | 132 | 1 | -10.773153 | -1.517855 | 0.166491  |
| 88  | 1 | 5.64673    | -0.920927 | 3.287291  | 133 | 1 | -12.274968 | -2.008906 | 0.936307  |
| 89  | 1 | 4.7357     | -3.630218 | 0.586224  | 134 | 1 | -11.919795 | -2.577299 | -0.689757 |
| 90  | 1 | 5.245657   | -2.981894 | 2.13882   | 135 | 1 | -11.241596 | -6.445153 | -0.904822 |
| 91  | 6 | 6.359175   | -2.19071  | 0.447931  | 136 | 1 | -11.485937 | -5.643125 | -2.44906  |
| 92  | 1 | -4.428108  | -3.966935 | -0.591038 | 137 | 1 | -12.24254  | -4.977171 | -1.007529 |
| 93  | 1 | -4.995669  | -3.344328 | -2.134079 | 138 | 1 | -8.555962  | -6.022182 | 0.290684  |
| 94  | 6 | -6.135373  | -2.628154 | -0.427322 | 139 | 1 | -10.179119 | -6.129716 | 0.966051  |
| 95  | 1 | -5.929809  | -2.337162 | 0.607506  | 140 | 6 | -8.716018  | -5.338232 | 2.340752  |
| 96  | 6 | -7.192748  | -3.750133 | -0.459321 | 141 | 1 | -7.779255  | -4.774302 | 2.363389  |
| 97  | 1 | -6.513219  | -1.739055 | -0.947162 | 142 | 1 | -8.499569  | -6.339128 | 2.728229  |
| 98  | 1 | 6.146511   | -1.901675 | -0.585852 | 143 | 1 | -9.425871  | -4.877969 | 3.032757  |
| 99  | 6 | 7.473861   | -3.255813 | 0.478426  | 144 | 1 | 9.463283   | -4.904908 | 1.411623  |
| 100 | 1 | 6.683279   | -1.287369 | 0.979396  | 145 | 6 | 10.530586  | -3.255868 | 2.3292    |
| 101 | 1 | 7.13969    | -4.125583 | -0.097806 | 146 | 1 | 11.181719  | -4.848965 | 1.030213  |
| 102 | 1 | 7.628601   | -3.588488 | 1.511402  | 147 | 6 | 11.129469  | -2.240383 | -2.065027 |
| 103 | 6 | 8.76816    | -2.676178 | -0.102331 | 148 | 1 | 12.053478  | -3.469702 | -0.540435 |
| 104 | 1 | -6.812267  | -4.608205 | 0.105908  | 149 | 1 | 11.304533  | -1.997629 | 0.073665  |
| 105 | 1 | -7.336624  | -4.079405 | -1.494868 | 150 | 1 | 9.659793   | -2.633251 | 2.552772  |
| 106 | 6 | -8.509552  | -3.241556 | 0.13757   | 151 | 1 | 11.397894  | -2.610126 | 2.17095   |
| 107 | 1 | 8.593115   | -2.329068 | -1.122217 | 152 | 1 | 10.738604  | -3.852408 | 3.223422  |
| 108 | 7 | 9.975056   | -3.61613  | -0.184116 | 153 | 1 | 11.073099  | -3.013198 | -2.835784 |
| 109 | 1 | 9.094874   | -1.816784 | 0.487385  | 154 | 1 | 12.060405  | -1.688713 | -2.231887 |
| 110 | 1 | -8.352373  | -2.903523 | 1.164361  | 155 | 1 | 10.31012   | -1.531235 | -2.209645 |
| 111 | 7 | -9.675726  | -4.232764 | 0.193775  | 156 | 9 | -0.837923  | -2.8063   | -2.563308 |
| 112 | 1 | -8.872173  | -2.388813 | -0.439016 | 157 | 9 | 4.477069   | -3.386485 | -1.523505 |
| 113 | 6 | -9.278079  | -5.515854 | 0.934222  | 158 | 9 | 1.101857   | -2.755136 | 2.533721  |
| 114 | 6 | -10.088522 | -4.601441 | -1.237884 | 159 | 9 | -4.15893   | -3.730445 | 1.513738  |
| 115 | 6 | -10.841158 | -3.572604 | 0.94641   |     |   |            |           |           |
| 116 | 1 | 4.844131   | 0.805555  | 4.875394  |     |   |            |           |           |
| 117 | 6 | 9.659228   | -4.747519 | -1.171955 |     |   |            |           |           |
| 118 | 6 | 10.294079  | -4.234124 | 1.183497  |     |   |            |           |           |
| 119 | 6 | 11.194065  | -2.805834 | -0.650456 |     |   |            |           |           |
| 120 | 1 | 8.822546   | -5.295362 | -0.7361   |     |   |            |           |           |
| 121 | 6 | 10.80381   | -5.70352  | -1.490774 |     |   |            |           |           |
| 122 | 1 | 9.301755   | -4.258463 | -2.080233 |     |   |            |           |           |
| 123 | 1 | 11.156827  | -6.259658 | -0.618768 |     |   |            |           |           |
| 124 | 1 | 11.655173  | -5.212036 | -1.9682   |     |   |            |           |           |
| 125 | 1 | 10.418258  | -6.440648 | -2.202709 |     |   |            |           |           |
| 126 | 1 | -9.227883  | -5.113554 | -1.670882 |     |   |            |           |           |
| 127 | 1 | -10.215468 | -3.65461  | -1.766455 |     |   |            |           |           |
| 128 | 6 | -11.337879 | -5.465026 | -1.378917 |     |   |            |           |           |
| 129 | 1 | -10.445051 | -3.305674 | 1.927005  |     |   |            |           |           |

**Table S4.** B3LYP optimised coordinates of complex [4]<sup>3+</sup> in gas phase.



| Center Number | Atomic Number | Coordinates (Å) |          |          |    |   |          |          |          |
|---------------|---------------|-----------------|----------|----------|----|---|----------|----------|----------|
|               |               | X               | Y        | Z        |    |   |          |          |          |
|               |               |                 |          |          | 44 | 6 | -1.87371 | 3.539345 | 2.255435 |
|               |               |                 |          |          | 45 | 1 | -2.27186 | 4.454329 | 2.68012  |
| 1             | 77            | 0.055301        | -0.48792 | 0.051371 | 46 | 6 | -1.01453 | 3.626078 | 1.143566 |
| 2             | 7             | 1.925417        | -0.48987 | 0.971519 | 47 | 6 | -0.51752 | 2.424981 | 0.595646 |
| 3             | 7             | -1.80877        | -0.67321 | -0.86373 | 48 | 6 | 0.358451 | 2.453238 | -0.55526 |
| 4             | 7             | -0.82736        | 1.206189 | 1.120335 | 49 | 6 | 1.605153 | 1.250899 | -2.10489 |
| 5             | 7             | 0.782615        | 1.257528 | -1.05257 | 50 | 1 | 1.910389 | 0.275298 | -2.46542 |
| 6             | 7             | 3.909058        | -1.44467 | 1.341568 | 51 | 6 | 2.04153  | 2.430469 | -2.72423 |
| 7             | 7             | -3.71326        | -1.78973 | -1.19814 | 52 | 1 | 2.706385 | 2.369516 | -3.57921 |
| 8             | 7             | 0.677136        | 6.095802 | -1.06133 | 53 | 6 | 1.610699 | 3.652922 | -2.23724 |
| 9             | 7             | -1.17284        | 6.032802 | 1.023179 | 54 | 1 | 1.922939 | 4.591673 | -2.68141 |
| 10            | 7             | -1.89944        | 9.236421 | -0.11187 | 55 | 6 | 0.742937 | 3.68311  | -1.12909 |
| 11            | 7             | 1.10701         | 9.375471 | 0.004761 | 56 | 6 | 0.245475 | 4.923931 | -0.55487 |
| 12            | 6             | 1.042723        | -1.91206 | -1.03838 | 57 | 6 | -0.63464 | 4.894992 | 0.541476 |
| 13            | 6             | -0.80438        | -1.97091 | 1.170846 | 58 | 6 | -0.81603 | 7.187337 | 0.475476 |
| 14            | 6             | 0.570659        | -2.61909 | -2.14012 | 59 | 6 | 0.21547  | 7.224096 | -0.53796 |
| 15            | 6             | 1.360966        | -3.49607 | -2.88599 | 60 | 6 | 0.875974 | 8.482804 | -0.97092 |
| 16            | 6             | 2.693928        | -3.67977 | -2.53849 | 61 | 6 | 1.285294 | 8.666309 | -2.29615 |
| 17            | 6             | 3.201807        | -3.00275 | -1.4384  | 62 | 1 | 1.080594 | 7.906005 | -3.04179 |
| 18            | 6             | 2.402707        | -2.16052 | -0.65448 | 63 | 6 | 1.941661 | 9.851067 | -2.62559 |
| 19            | 6             | 2.800181        | -1.40392 | 0.529743 | 64 | 1 | 2.258297 | 10.04002 | -3.64718 |
| 20            | 6             | 2.474459        | 0.119799 | 2.089545 | 65 | 6 | 2.182068 | 10.78734 | -1.62109 |
| 21            | 6             | 2.002258        | 1.12733  | 2.940254 | 66 | 1 | 2.69071  | 11.72254 | -1.83258 |
| 22            | 1             | 1.039693        | 1.59199  | 2.778768 | 67 | 6 | 1.752455 | 10.49683 | -0.32194 |
| 23            | 6             | 2.807594        | 1.506667 | 4.00793  | 68 | 1 | 1.935159 | 11.19742 | 0.49013  |
| 24            | 1             | 2.465466        | 2.286112 | 4.681472 | 69 | 6 | -1.58849 | 8.389783 | 0.882524 |
| 25            | 6             | 4.057397        | 0.900714 | 4.239972 | 70 | 6 | -2.01199 | 8.564649 | 2.204446 |
| 26            | 1             | 4.656866        | 1.221947 | 5.085741 | 71 | 1 | -1.7394  | 7.842221 | 2.965853 |
| 27            | 6             | 4.537595        | -0.10232 | 3.404298 | 72 | 6 | -2.77139 | 9.692979 | 2.509832 |
| 28            | 1             | 5.501271        | -0.56562 | 3.589196 | 73 | 1 | -3.10285 | 9.875239 | 3.527917 |
| 29            | 6             | 3.727517        | -0.47624 | 2.32956  | 74 | 6 | -3.09502 | 10.58186 | 1.48588  |
| 30            | 6             | 4.974746        | -2.44771 | 1.428213 | 75 | 1 | -3.68477 | 11.47248 | 1.67834  |
| 31            | 6             | -0.26896        | -2.61431 | 2.282137 | 76 | 6 | -2.64234 | 10.30243 | 0.192202 |
| 32            | 6             | -0.97941        | -3.54037 | 3.048707 | 77 | 1 | -2.8879  | 10.96589 | -0.63438 |
| 33            | 6             | -2.29413        | -3.84233 | 2.71333  | 78 | 6 | -2.40962 | -0.13432 | -1.99116 |
| 34            | 6             | -2.86278        | -3.23033 | 1.604502 | 79 | 6 | -2.85924 | 1.177431 | -3.93865 |
| 35            | 6             | -2.14002        | -2.33967 | 0.800613 | 80 | 1 | -2.58191 | 1.965044 | -4.63218 |
| 36            | 6             | -2.60525        | -1.64432 | -0.39595 | 81 | 6 | -4.05863 | 0.470458 | -4.14868 |
| 37            | 6             | -2.02161        | 0.88649  | -2.86793 | 82 | 6 | -3.61299 | -0.8322  | -2.20886 |
| 38            | 1             | -1.09662        | 1.427165 | -2.72483 | 83 | 6 | -4.45421 | -0.54791 | -3.28735 |
| 39            | 6             | -4.70702        | -2.86684 | -1.25764 | 84 | 1 | -5.37803 | -1.09115 | -3.45676 |
| 40            | 6             | -1.6424         | 1.146059 | 2.176856 | 85 | 1 | -4.29534 | -3.74518 | -0.76644 |
| 41            | 1             | -1.85289        | 0.154574 | 2.560939 | 86 | 1 | -4.82688 | -3.11629 | -2.31718 |
| 42            | 6             | -2.18627        | 2.293164 | 2.771567 | 87 | 6 | -6.06531 | -2.48498 | -0.64509 |
| 43            | 1             | -2.83986        | 2.189297 | 3.631079 | 88 | 1 | 4.616054 | -3.36785 | 0.972132 |

|     |   |          |          |          |     |   |          |          |          |
|-----|---|----------|----------|----------|-----|---|----------|----------|----------|
| 89  | 1 | 5.120944 | -2.65357 | 2.493455 | 127 | 6 | 11.60457 | -2.10958 | -0.32917 |
| 90  | 6 | 6.297325 | -2.00141 | 0.78202  | 128 | 1 | 11.0186  | -1.22531 | -0.06475 |
| 91  | 1 | 6.090868 | -1.64244 | -0.23086 | 129 | 1 | 12.37979 | -1.77912 | -1.0283  |
| 92  | 6 | 7.300817 | -3.17027 | 0.724216 | 130 | 1 | 12.11602 | -2.47896 | 0.563332 |
| 93  | 1 | 6.720466 | -1.16006 | 1.344355 | 131 | 1 | 11.02849 | -6.27513 | 0.47325  |
| 94  | 1 | -5.91039 | -2.15772 | 0.387585 | 132 | 1 | 11.5145  | -5.66831 | 2.049291 |
| 95  | 6 | -7.03953 | -3.68053 | -0.67553 | 133 | 1 | 12.19991 | -4.94093 | 0.602136 |
| 96  | 1 | -6.4887  | -1.63549 | -1.19541 | 134 | 1 | 8.379359 | -5.50464 | -0.38927 |
| 97  | 1 | -6.60607 | -4.49446 | -0.0841  | 135 | 1 | 9.880159 | -5.61422 | -1.30345 |
| 98  | 1 | -7.13678 | -4.04178 | -1.70608 | 136 | 6 | 8.301501 | -4.56901 | -2.34128 |
| 99  | 6 | -8.4035  | -3.26322 | -0.1146  | 137 | 1 | 7.388944 | -3.99591 | -2.15401 |
| 100 | 1 | 6.831658 | -3.99842 | 0.182282 | 138 | 1 | 8.000208 | -5.49952 | -2.83343 |
| 101 | 1 | 7.509678 | -3.52244 | 1.740666 | 139 | 1 | 8.927396 | -4.02424 | -3.0529  |
| 102 | 6 | 8.589932 | -2.7244  | 0.027444 | 140 | 1 | -8.78337 | -5.57296 | -1.61089 |
| 103 | 1 | -8.28626 | -2.89015 | 0.904339 | 141 | 6 | -10.0406 | -4.08636 | -2.56378 |
| 104 | 7 | -9.48221 | -4.34785 | -0.03919 | 142 | 1 | -10.5002 | -5.73804 | -1.25373 |
| 105 | 1 | -8.82962 | -2.45639 | -0.7151  | 143 | 6 | -10.8239 | -3.09729 | 1.803995 |
| 106 | 1 | 8.359197 | -2.28424 | -0.94508 | 144 | 1 | -11.5635 | -4.47138 | 0.303062 |
| 107 | 7 | 9.635061 | -3.80759 | -0.24233 | 145 | 1 | -11.0141 | -2.92576 | -0.34072 |
| 108 | 1 | 9.093818 | -1.96249 | 0.624638 | 146 | 1 | -9.25444 | -3.35759 | -2.77973 |
| 109 | 6 | 9.040967 | -4.95941 | -1.06537 | 147 | 1 | -10.9872 | -3.55791 | -2.42715 |
| 110 | 6 | 10.13642 | -4.36522 | 1.096855 | 148 | 1 | -10.1531 | -4.71313 | -3.45438 |
| 111 | 6 | 10.79052 | -3.18418 | -1.04188 | 149 | 1 | -10.6536 | -3.83655 | 2.590862 |
| 112 | 1 | -4.6851  | 0.723497 | -4.99805 | 150 | 1 | -11.827  | -2.68748 | 1.961143 |
| 113 | 6 | -9.03987 | -5.42091 | 0.966068 | 151 | 1 | -10.12   | -2.27064 | 1.93176  |
| 114 | 6 | -9.69812 | -5.01441 | -1.40336 | 152 | 9 | 0.990036 | -2.36835 | 2.703863 |
| 115 | 6 | -10.8017 | -3.69588 | 0.401872 | 153 | 9 | -4.16571 | -3.52634 | 1.37159  |
| 116 | 1 | -8.13794 | -5.86676 | 0.544036 | 154 | 9 | -0.70125 | -2.48831 | -2.57317 |
| 117 | 6 | -10.0593 | -6.50894 | 1.288746 | 155 | 9 | 4.525636 | -3.18775 | -1.19597 |
| 118 | 1 | -8.7543  | -4.88216 | 1.871705 | 156 | 9 | 3.484434 | -4.48218 | -3.25746 |
| 119 | 1 | -10.3378 | -7.11214 | 0.420928 | 157 | 9 | 0.853916 | -4.1402  | -3.93448 |
| 120 | 1 | -10.9664 | -6.12348 | 1.760736 | 158 | 9 | -0.41472 | -4.11941 | 4.10555  |
| 121 | 1 | -9.58718 | -7.18665 | 2.00756  | 159 | 9 | -3.00897 | -4.69491 | 3.451812 |
| 122 | 1 | 9.268307 | -4.82787 | 1.569211 |     |   |          |          |          |
| 123 | 1 | 10.41954 | -3.49675 | 1.694848 |     |   |          |          |          |
| 124 | 6 | 11.28487 | -5.36562 | 1.022422 |     |   |          |          |          |
| 125 | 1 | 10.33786 | -2.77814 | -1.94779 |     |   |          |          |          |
| 126 | 1 | 11.43146 | -4.01709 | -1.33598 |     |   |          |          |          |

**Figure S7.** B3LYP optimised geometry of the complexes  $[1]^{3+} - [3]^{3+}$  and their SCF energies in gas phase.

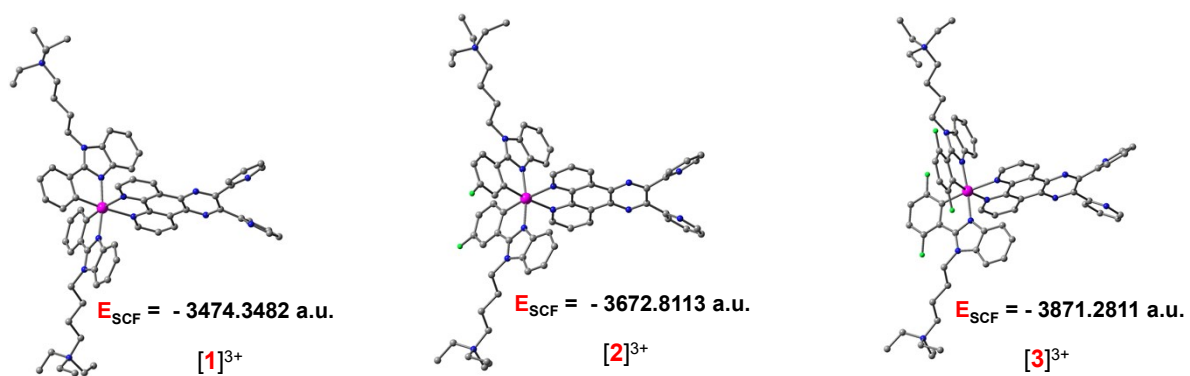

**Figure S8.** DFT optimised frontier orbitals of complex **[1]<sup>3+</sup>** in gas phase.

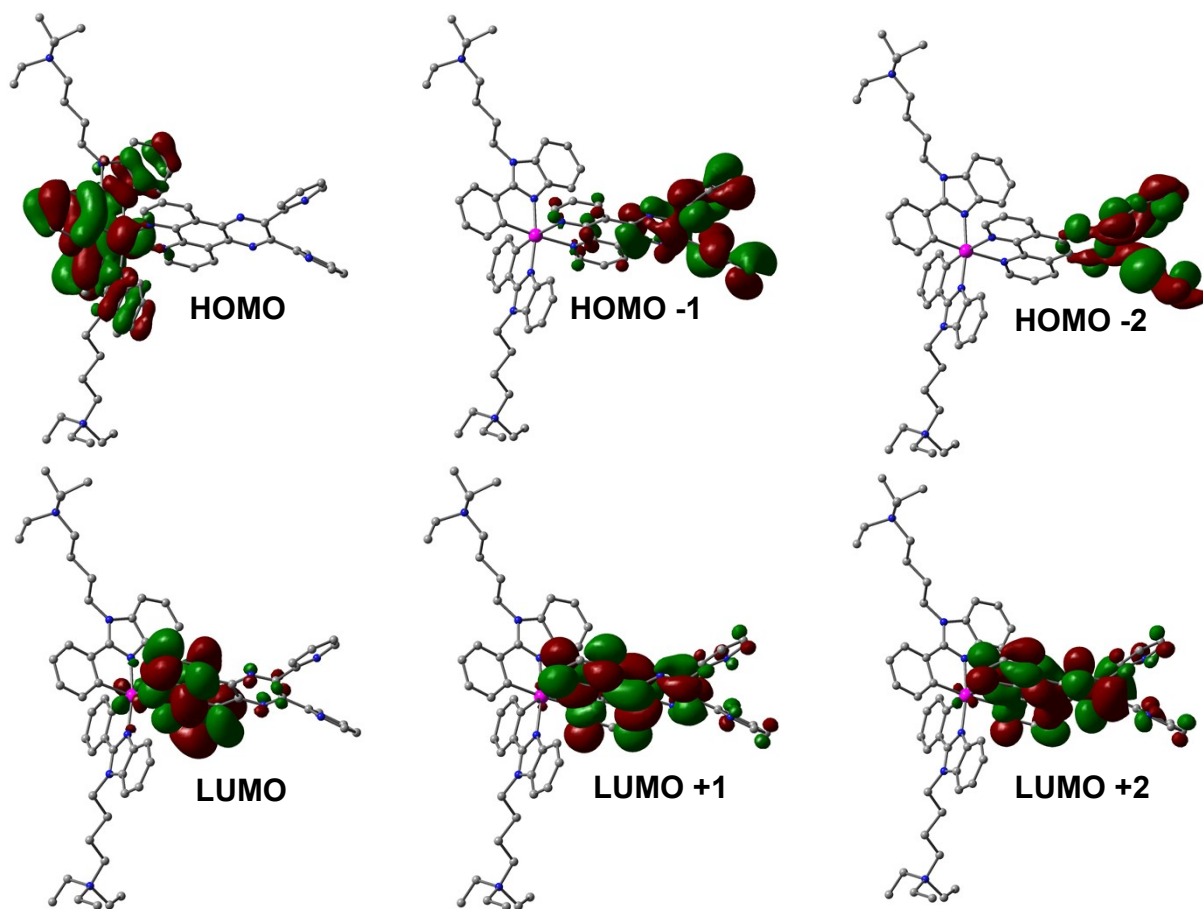

**Figure S9.** DFT optimised frontier orbitals of complex  $[2]^{3+}$  in gas phase.

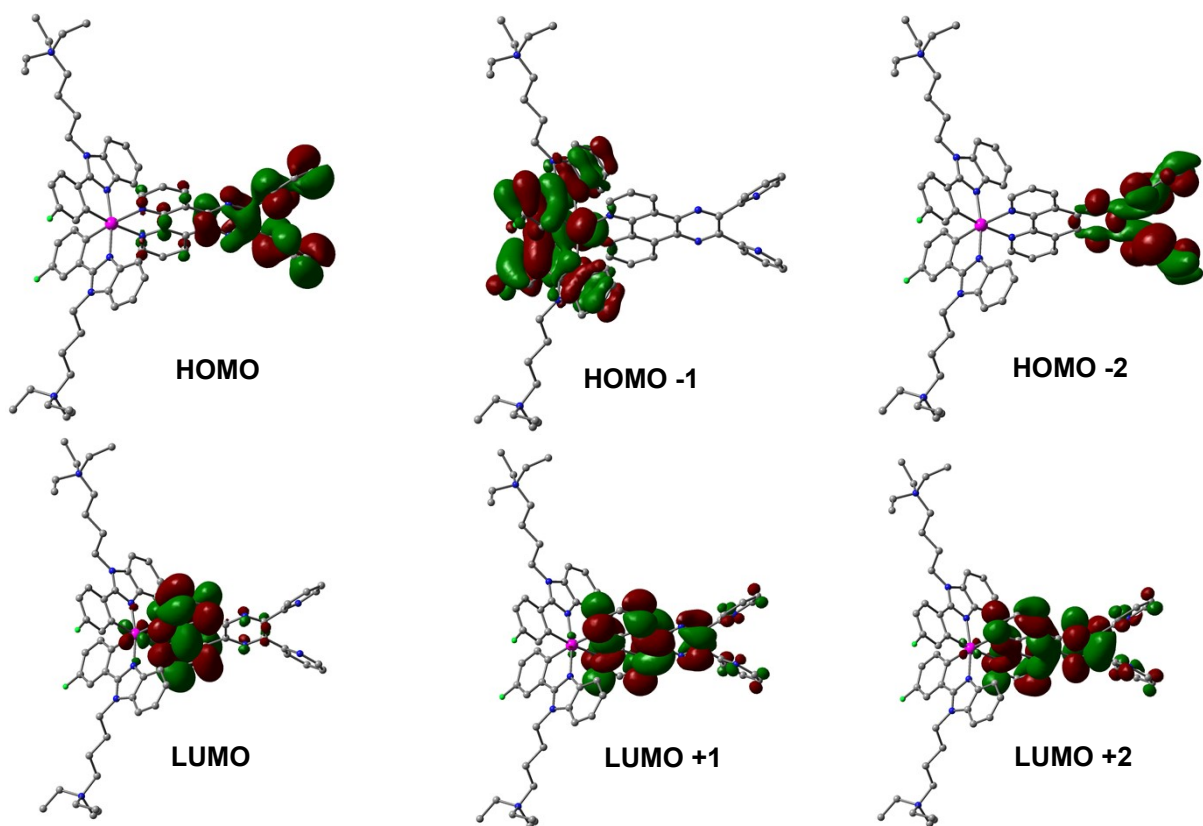

**Figure S10.** DFT optimised frontier orbitals of the complex  $[3]^{3+}$  in gas phase.

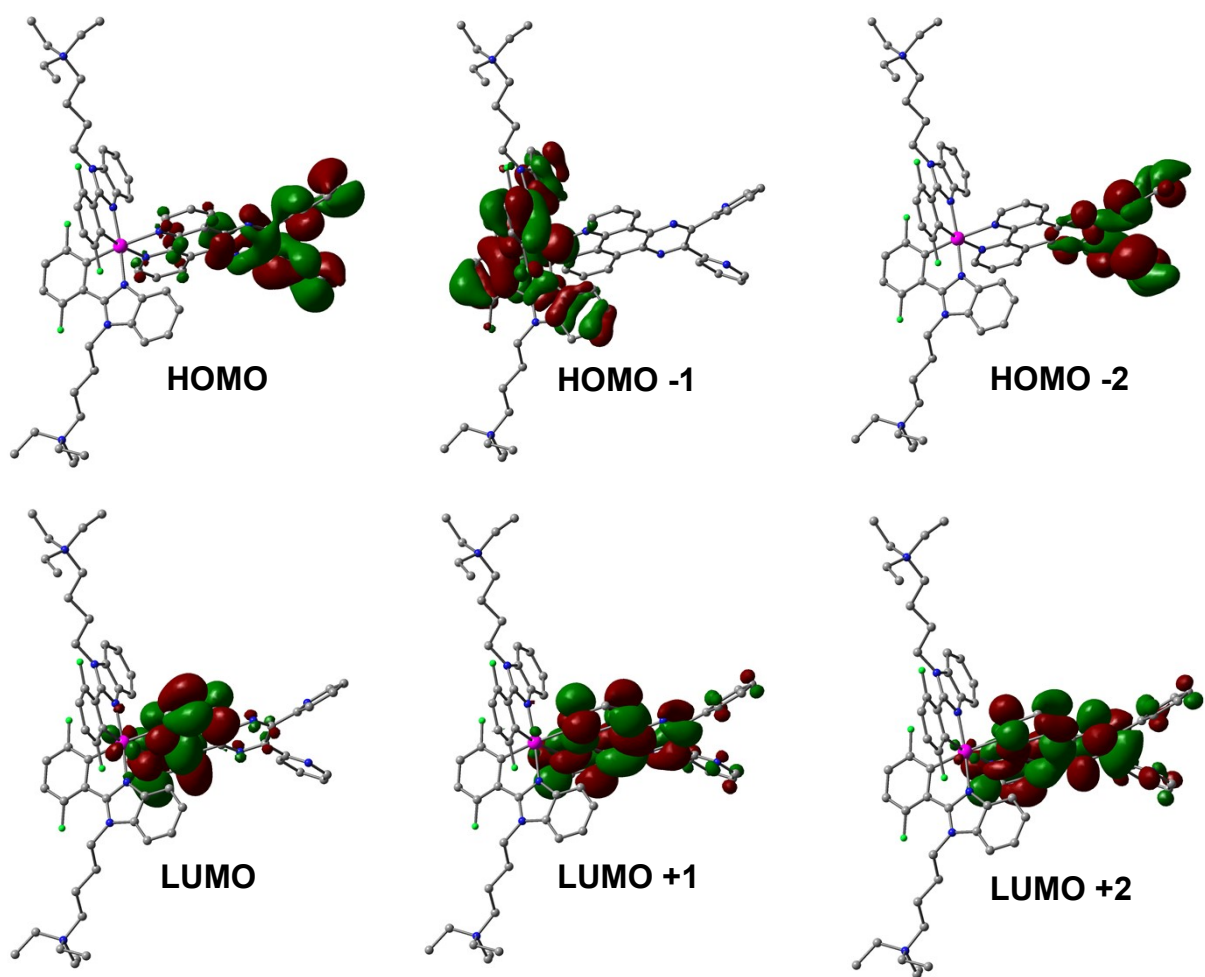

**Figure S11.** DFT optimised frontier orbitals of the complex  $[4]^{3+}$  in gas phase.

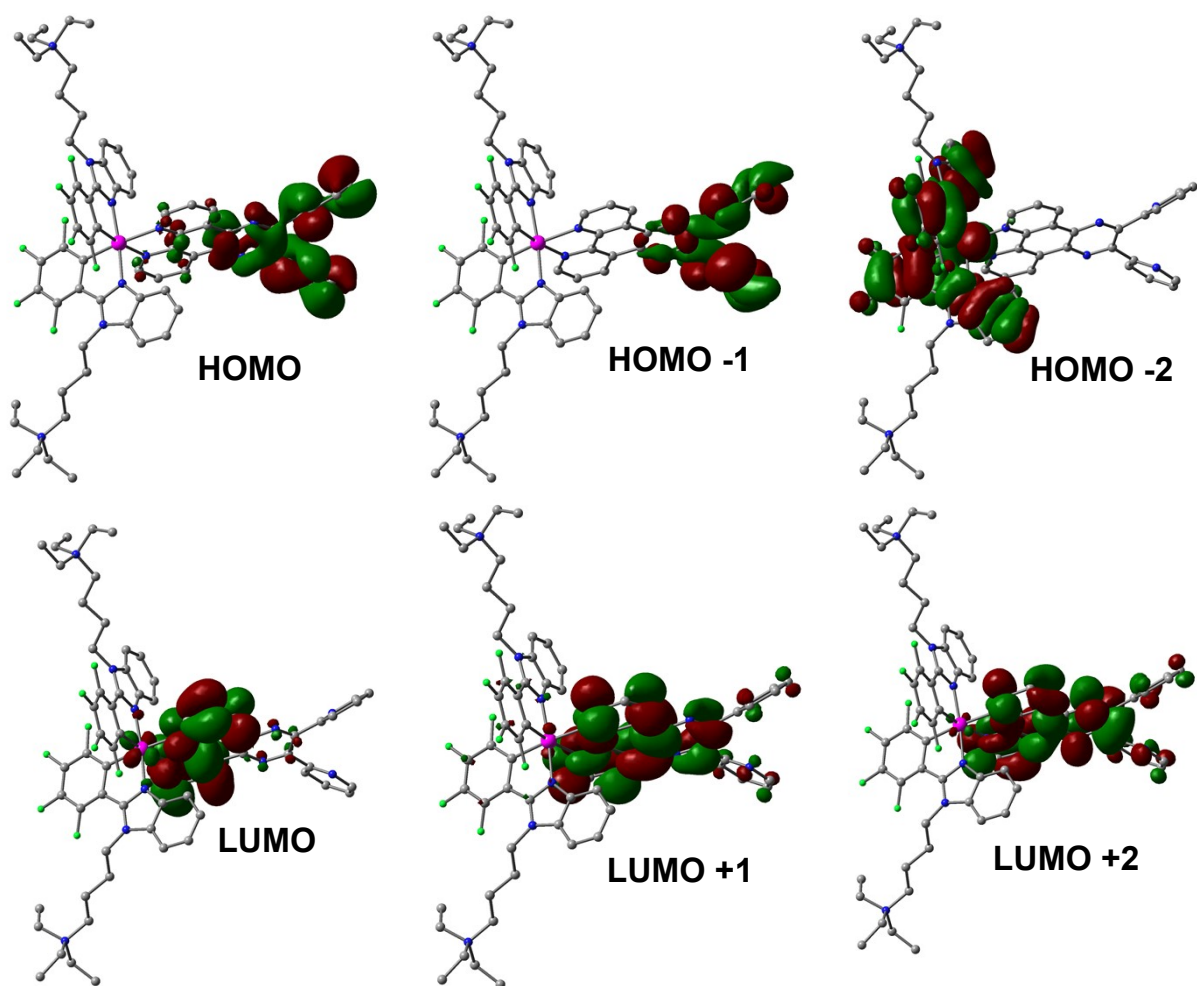

**Figure S12.** Spin density plot (T1 state) for complexes [1]<sup>3+</sup> - [4]<sup>3+</sup>.

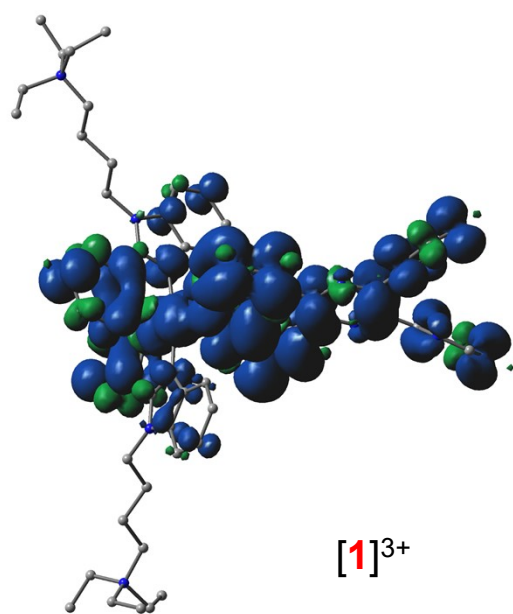

$[1]^{3+}$

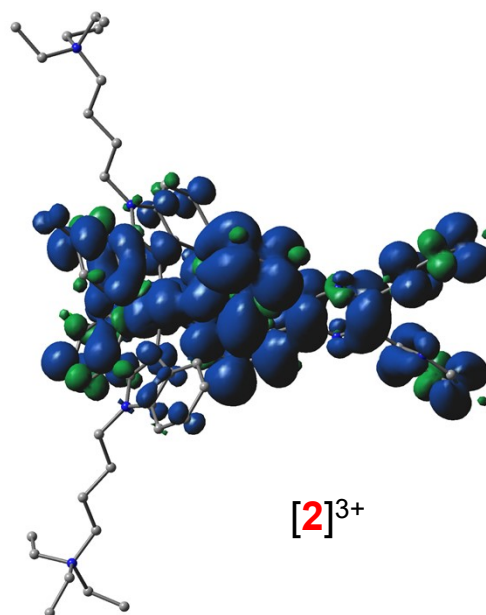

$[2]^{3+}$

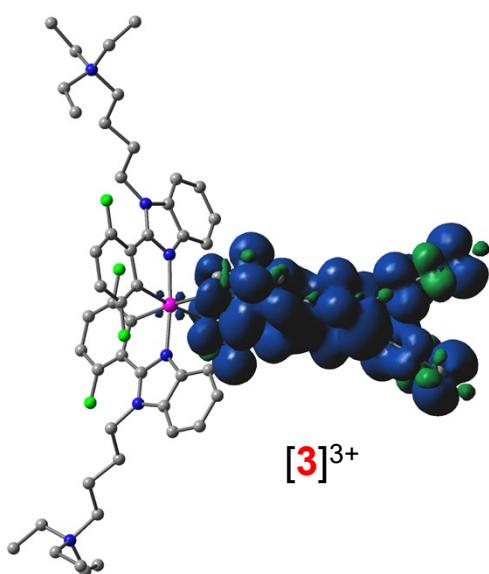

$[3]^{3+}$

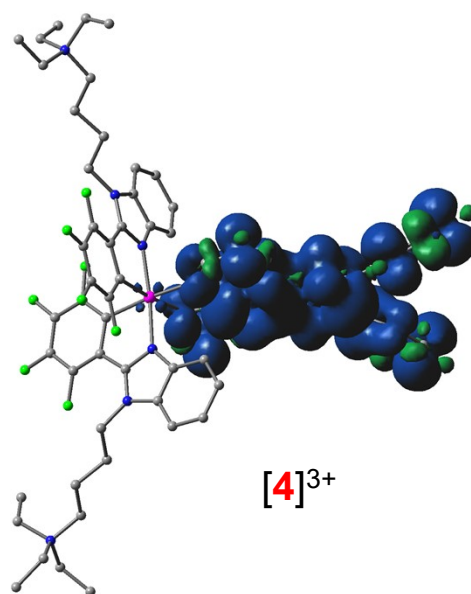

$[4]^{3+}$

**Table S5.** Molecular orbital composition of the complexes  $[1]^{3+}$



| MOs         | eV            | imd2      | phpy      | imd1      | lr        |
|-------------|---------------|-----------|-----------|-----------|-----------|
| L+10        | -4.65         | 40        | 8         | 43        | 8         |
| L+9         | -4.79         | 53        | 3         | 39        | 5         |
| L+8         | -4.83         | 44        | 5         | 41        | 10        |
| L+7         | -4.84         | 37        | 7         | 49        | 6         |
| zL+6        | -5.07         | 5         | 89        | 5         | 2         |
| L+5         | -5.3          | 0         | 99        | 0         | 0         |
| L+4         | -6.22         | 48        | 2         | 47        | 3         |
| L+3         | -6.37         | 48        | 1         | 49        | 2         |
| L+2         | -6.57         | 0         | 99        | 0         | 1         |
| L+1         | -6.74         | 1         | 98        | 1         | 0         |
| <b>LUMO</b> | <b>-7.02</b>  | <b>0</b>  | <b>97</b> | <b>0</b>  | <b>3</b>  |
| <b>HOMO</b> | <b>-10.28</b> | <b>32</b> | <b>1</b>  | <b>32</b> | <b>35</b> |
| H-1         | -10.32        | 0         | 100       | 0         | 0         |
| H-2         | -10.58        | 0         | 100       | 0         | 0         |
| H-3         | -10.61        | 40        | 2         | 39        | 19        |
| H-4         | -10.78        | 0         | 99        | 0         | 0         |
| H-5         | -10.8         | 29        | 3         | 30        | 38        |
| H-6         | -10.94        | 0         | 100       | 0         | 0         |
| H-7         | -11.06        | 37        | 5         | 33        | 25        |
| H-8         | -11.14        | 40        | 1         | 43        | 16        |
| H-9         | -11.31        | 1         | 98        | 1         | 0         |
| H-10        | -11.38        | 49        | 2         | 49        | 1         |

**Table S6.** Molecular orbital composition of the complexes [2]<sup>3+</sup>

| MO          | eV            | Phpy       | imd1     | imd2     | lr       |
|-------------|---------------|------------|----------|----------|----------|
| L+10        | -4.76         | 7          | 14       | 67       | 12       |
| L+9         | -4.89         | 2          | 73       | 18       | 6        |
| L+8         | -4.95         | 7          | 17       | 69       | 7        |
| L+7         | -5.02         | 15         | 69       | 8        | 7        |
| L+6         | -5.15         | 78         | 12       | 8        | 2        |
| L+5         | -5.37         | 99         | 0        | 0        | 0        |
| L+4         | -6.32         | 2          | 79       | 16       | 2        |
| L+3         | -6.52         | 1          | 17       | 80       | 2        |
| L+2         | -6.63         | 99         | 0        | 0        | 1        |
| L+1         | -6.81         | 98         | 1        | 1        | 0        |
| <b>LUMO</b> | <b>-7.1</b>   | <b>97</b>  | <b>0</b> | <b>0</b> | <b>3</b> |
| <b>HOMO</b> | <b>-10.36</b> | <b>100</b> | <b>0</b> | <b>0</b> | <b>0</b> |
| H-1         | -10.39        | 1          | 27       | 40       | 32       |
| H-2         | -10.62        | 100        | 0        | 0        | 0        |
| H-3         | -10.68        | 2          | 55       | 28       | 15       |
| H-4         | -10.82        | 99         | 1        | 0        | 0        |
| H-5         | -10.94        | 5          | 16       | 41       | 37       |
| H-6         | -10.98        | 97         | 0        | 1        | 1        |
| H-7         | -11.16        | 5          | 53       | 15       | 27       |
| H-8         | -11.27        | 2          | 21       | 61       | 16       |
| H-9         | -11.35        | 98         | 1        | 1        | 0        |
| H-10        | -11.53        | 4          | 44       | 50       | 3        |

**Table S7.** Molecular orbital composition of the complexes **[3]<sup>3+</sup>**

|             | eV            | imd2     | imd1     | phpy       | lr       |
|-------------|---------------|----------|----------|------------|----------|
| L+10        | -4.72         | 14       | 15       | 69         | 2        |
| L+9         | -4.74         | 45       | 47       | 4          | 4        |
| L+8         | -5            | 46       | 35       | 4          | 15       |
| L+7         | -5.03         | 35       | 47       | 5          | 14       |
| L+6         | -5.2          | 2        | 2        | 95         | 2        |
| L+5         | -5.43         | 0        | 0        | 99         | 0        |
| L+4         | -6.46         | 49       | 43       | 4          | 3        |
| L+3         | -6.52         | 45       | 51       | 1          | 3        |
| L+2         | -6.7          | 0        | 0        | 99         | 1        |
| L+1         | -6.89         | 1        | 2        | 96         | 0        |
| <b>LUMO</b> | <b>-7.19</b>  | <b>0</b> | <b>0</b> | <b>97</b>  | <b>2</b> |
| <b>HOMO</b> | <b>-10.39</b> | <b>0</b> | <b>0</b> | <b>100</b> | <b>0</b> |
| H-1         | -10.62        | 32       | 31       | 2          | 35       |
| H-2         | -10.65        | 0        | 0        | 99         | 0        |
| H-3         | -10.82        | 48       | 35       | 2          | 15       |
| H-4         | -10.85        | 34       | 47       | 1          | 18       |
| H-5         | -10.86        | 0        | 0        | 99         | 0        |
| H-6         | -11.02        | 0        | 0        | 100        | 0        |
| H-7         | -11.17        | 58       | 25       | 1          | 16       |
| H-8         | -11.18        | 25       | 58       | 2          | 14       |
| H-9         | -11.28        | 49       | 49       | 2          | 1        |
| H-10        | -11.38        | 0        | 0        | 99         | 0        |

**Table S8.** Molecular orbital composition of the complexes [4]<sup>3+</sup>

| MOs         | eV            | lr       | phpy       | imd1     | imd2     |
|-------------|---------------|----------|------------|----------|----------|
| L+10        | -4.97         | 5        | 3          | 41       | 51       |
| L+9         | -5.02         | 2        | 4          | 51       | 43       |
| L+8         | -5.23         | 28       | 4          | 34       | 35       |
| L+7         | -5.32         | 25       | 11         | 29       | 35       |
| L+6         | -5.35         | 3        | 90         | 3        | 3        |
| L+5         | -5.56         | 0        | 99         | 0        | 0        |
| L+4         | -6.7          | 3        | 5          | 51       | 41       |
| L+3         | -6.77         | 2        | 1          | 43       | 54       |
| L+2         | -6.83         | 1        | 99         | 0        | 0        |
| L+1         | -7.05         | 0        | 96         | 2        | 2        |
| <b>LUMO</b> | <b>-7.37</b>  | <b>2</b> | <b>97</b>  | <b>0</b> | <b>0</b> |
| <b>HOMO</b> | <b>-10.48</b> | <b>0</b> | <b>100</b> | <b>0</b> | <b>0</b> |
| H-1         | -10.73        | 0        | 100        | 0        | 0        |
| H-2         | -10.86        | 28       | 1          | 36       | 35       |
| H-3         | -10.94        | 0        | 100        | 0        | 0        |
| H-4         | -11.02        | 10       | 1          | 43       | 46       |
| H-5         | -11.1         | 1        | 98         | 1        | 1        |
| H-6         | -11.13        | 22       | 4          | 39       | 35       |
| H-7         | -11.37        | 13       | 2          | 9        | 75       |
| H-8         | -11.39        | 14       | 1          | 76       | 9        |
| H-9         | -11.46        | 0        | 99         | 0        | 0        |
| H-10        | -11.64        | 2        | 2          | 46       | 50       |

**Table S9.** TDDFT calculated vertical transition of complex [1]<sup>3+</sup>

| Wavelength (nm) |          |               |                                                   |                                                                                                                                                                                |
|-----------------|----------|---------------|---------------------------------------------------|--------------------------------------------------------------------------------------------------------------------------------------------------------------------------------|
| Observed        | Computed | Osc. Strength | Major contribution                                | Character                                                                                                                                                                      |
| 400             | 433.59   | 0.0668        | H-1 → LUMO (97%)                                  | phpy <sub>π</sub> → phpy <sub>π</sub> *                                                                                                                                        |
| 400             | 411.98   | 0.0314        | H-3 → LUMO (95%)                                  | imd <sub>π</sub> /lr <sub>dπ</sub> → phpy <sub>π</sub> *                                                                                                                       |
| 400             | 394.53   | 0.0494        | H-2 → LUMO (30%), H-1 → L+1 (67%)                 | phpy <sub>π</sub> → phpy <sub>π</sub> *; phpy <sub>π</sub> → phpy <sub>π</sub> *                                                                                               |
| 400             | 391.75   | 0.0778        | H-1 → L+2 (78%)                                   | phpy <sub>π</sub> → phpy <sub>π</sub> *                                                                                                                                        |
| 400             | 385.79   | 0.1078        | HOMO → L+3 (94%)                                  | imd <sub>π</sub> /lr <sub>dπ</sub> → imd <sub>π</sub> *                                                                                                                        |
| 358             | 379.50   | 0.0568        | H-2 → L+1 (80%)                                   | phpy <sub>π</sub> → phpy <sub>π</sub> *                                                                                                                                        |
| 358             | 371.97   | 0.061         | H-4 → LUMO (84%)                                  | phpy <sub>π</sub> → phpy <sub>π</sub> *                                                                                                                                        |
| 358             | 352.95   | 0.0225        | H-7 → LUMO (36%), H-5 → L+1 (53%)                 | imd <sub>π</sub> /lr <sub>dπ</sub> → phpy <sub>π</sub> *; imd <sub>π</sub> /lr <sub>dπ</sub> → phpy <sub>π</sub> *                                                             |
| 358             | 345.29   | 0.0322        | H-3 → L+2 (89%)                                   | imd <sub>π</sub> /lr <sub>dπ</sub> → phpy <sub>π</sub> *                                                                                                                       |
| 319             | 333.86   | 0.3266        | H-6 → L+1 (68%)                                   | phpy <sub>π</sub> → phpy <sub>π</sub> *                                                                                                                                        |
| 319             | 332.858  | 0.0272        | H-5 → L+2 (20%), H-5 → L+3 (32%), H-3 → L+4 (36%) | imd <sub>π</sub> /lr <sub>dπ</sub> → phpy <sub>π</sub> *; imd <sub>π</sub> /lr <sub>dπ</sub> → imd <sub>π</sub> *;<br>imd <sub>π</sub> /lr <sub>dπ</sub> → imd <sub>π</sub> *; |
| 319             | 326.19   | 0.0272        | H-5 → L+3 (24%), H-1 → L+4 (61%)                  | imd <sub>π</sub> /lr <sub>dπ</sub> → imd <sub>π</sub> *; phpy <sub>dπ</sub> → imd <sub>π</sub> *                                                                               |

**Table S10.** TDDFT calculated vertical transition of complex [2]<sup>3+</sup>

| Wavelength (nm) |          |               |                                    | Character                                                                                         |
|-----------------|----------|---------------|------------------------------------|---------------------------------------------------------------------------------------------------|
| Observed        | Computed | Osc. Strength | Major contributions                |                                                                                                   |
| 396             | 439.9255 | 0.0577        | HOMO → LUMO (98%)                  | phpy <sub>π</sub> → phpy <sub>π</sub> *                                                           |
| 396             | 412.2911 | 0.0292        | H-3 → LUMO (93%)                   | imd <sub>π</sub> /lr <sub>dπ</sub> → phpy <sub>π</sub> *                                          |
| 396             | 399.1250 | 0.0489        | H-2 → LUMO (24%), HOMO → L+1 (73%) | phpy <sub>π</sub> → phpy <sub>π</sub> *; phpy <sub>π</sub> → phpy <sub>π</sub> *                  |
| 396             | 394.8164 | 0.0801        | HOMO → L+2 (74%)                   | phpy <sub>π</sub> → phpy <sub>π</sub> *                                                           |
| 396             | 386.5928 | 0.1085        | H-1 → L+3 (95%)                    | phpy <sub>dπ</sub> → imd <sub>π</sub> *                                                           |
| 396             | 382.7499 | 0.0571        | H-2 → L+1 (79%)                    | phpy <sub>π</sub> → phpy <sub>π</sub> *                                                           |
| 358             | 376.1542 | 0.062         | H-4 → LUMO (86%)                   | phpy <sub>π</sub> → phpy <sub>π</sub> *                                                           |
| 358             | 355.3167 | 0.0224        | H-7 → LUMO (74%)                   | imd <sub>π</sub> /lr <sub>dπ</sub> → phpy <sub>π</sub> *                                          |
| 358             | 350.8821 | 0.0256        | H-4 → L+2 (75%)                    | phpy <sub>π</sub> → phpy <sub>π</sub> *                                                           |
| 358             | 344.9659 | 0.0187        | H-3 → L+3 (71%), HOMO → L+3 (20%)  | imd <sub>π</sub> /lr <sub>dπ</sub> → phpy <sub>π</sub> *; phpy <sub>π</sub> → phpy <sub>π</sub> * |
| 322             | 336.2009 | 0.3227        | H-6 → L+1 (65%)                    | phpy <sub>π</sub> → phpy <sub>π</sub> *                                                           |
| 322             | 328.3479 | 0.0623        | H-5 → L+3 (49%)                    | imd <sub>π</sub> /lr <sub>dπ</sub> → imd <sub>π</sub> *                                           |

**Table S11.** TDDFT calculated vertical transition of complex [3]<sup>3+</sup>

| Wavelength (nm) |          |               |                                       | Character                                                                                                              |
|-----------------|----------|---------------|---------------------------------------|------------------------------------------------------------------------------------------------------------------------|
| Observed        | computed | Osc. Strength | Major contributions                   |                                                                                                                        |
| 394             | 447.8065 | 0.0462        | HOMO → LUMO (98%)                     | phpy <sub>π</sub> → phpy <sub>π</sub> *                                                                                |
| 394             | 407.2265 | 0.0275        | H-4 → LUMO (29%),<br>H-3 → LUMO (65%) | imd <sub>π</sub> /Ir <sub>dπ</sub> → phpy <sub>π</sub> *;<br>imd <sub>π</sub> /Ir <sub>dπ</sub> → phpy <sub>π</sub> *; |
| 394             | 404.6614 | 0.0471        | HOMO → L+1 (80%)                      | phpy <sub>π</sub> → phpy <sub>π</sub> *                                                                                |
| 394             | 398.1381 | 0.0631        | HOMO → L+2 (71%)                      | phpy <sub>π</sub> → phpy <sub>π</sub> *                                                                                |
| 394             | 386.8461 | 0.0594        | H-2 → L+1 (77%)                       | phpy <sub>π</sub> → phpy <sub>π</sub> *                                                                                |
| 394             | 381.6659 | 0.0659        | H-5 → LUMO (89%)                      | phpy <sub>π</sub> → phpy <sub>π</sub> *                                                                                |
| 356             | 379.8535 | 0.0222        | H-2 → L+2 (81%)                       | phpy <sub>π</sub> → phpy <sub>π</sub> *                                                                                |
| 356             | 367.9929 | 0.0774        | H-1 → L+3 (90%)                       | imd <sub>π</sub> /Ir <sub>dπ</sub> → imd <sub>π</sub> *                                                                |
| 356             | 353.3723 | 0.0233        | H-5 → L+2 (78%)                       | imd <sub>π</sub> /Ir <sub>dπ</sub> → phpy <sub>π</sub> *                                                               |
| 356             | 339.4966 | 0.3281        | H-6 → L+1 (60%)                       | imd <sub>π</sub> /Ir <sub>dπ</sub> → phpy <sub>π</sub> *                                                               |

**Table S12.** TDDFT calculated vertical transition of complex [4]<sup>3+</sup>

| Wavelength (nm) |             |               |                     | Character                                                |
|-----------------|-------------|---------------|---------------------|----------------------------------------------------------|
| Observed        | Computed    | Osc. Strength | Major contributions |                                                          |
| 396             | 463.3678538 | 0.0387        | HOMO → LUMO (99%)   | phpy <sub>π</sub> → phpy <sub>π</sub> *                  |
| 396             | 414.7709643 | 0.0467        | HOMO → L+1 (90%)    | phpy <sub>π</sub> → phpy <sub>π</sub> *                  |
| 396             | 405.6117272 | 0.0698        | HOMO → L+2 (62%)    | phpy <sub>π</sub> → phpy <sub>π</sub> *                  |
| 396             | 394.6879847 | 0.0362        | H-1 → L+1 (72%)     | phpy <sub>π</sub> → phpy <sub>π</sub> *                  |
| 396             | 392.3647477 | 0.0912        | H-3 → LUMO (78%)    | phpy <sub>π</sub> → phpy <sub>π</sub> *                  |
| 396             | 386.0244618 | 0.0231        | H-1 → L+2 (84%)     | phpy <sub>π</sub> → phpy <sub>π</sub> *                  |
| 363             | 364.1962713 | 0.0946        | H-2 → L+3 (91%)     | imd <sub>π</sub> /lr <sub>dπ</sub> → imd <sub>π</sub> *  |
| 363             | 361.5728686 | 0.0141        | H-7 → LUMO (85%)    | imd <sub>π</sub> /lr <sub>dπ</sub> → phpy <sub>π</sub> * |



**Table S13.** Calculated triplet states for complex [1]<sup>3+</sup>

| Triplet states  | Computed Wavelength (nm) | Major contributions                | Transition                                                                                                          | Nature                                 |
|-----------------|--------------------------|------------------------------------|---------------------------------------------------------------------------------------------------------------------|----------------------------------------|
| T <sub>1</sub>  | 486.728                  | HOMO → LUMO (70%)                  | imd <sub>π</sub> /lr <sub>dπ</sub> → phpy <sub>π</sub> *                                                            | <sup>3</sup> MLLCT                     |
| T <sub>2</sub>  | 474.999                  | H-1 → L+1 (47%), HOMO → LUMO (27%) | phpy <sub>π</sub> → phpy <sub>π</sub> *;<br>imd <sub>π</sub> /lr <sub>dπ</sub> → phpy <sub>π</sub> *                | <sup>3</sup> LC; <sup>3</sup> MLLCT    |
| T <sub>3</sub>  | 466.211                  | H-1 → LUMO (62%), H-1 → L+2 (25%)  | phpy <sub>π</sub> → phpy <sub>π</sub> *;<br>phpy <sub>π</sub> → phpy <sub>π</sub> *                                 | <sup>3</sup> LC; <sup>3</sup> LC       |
| T <sub>4</sub>  | 452.315                  | H-3 → L+4 (25%), HOMO → L+3 (57%)  | imd <sub>π</sub> /lr <sub>dπ</sub> → imd <sub>π</sub> *;<br>imd <sub>π</sub> /lr <sub>dπ</sub> → imd <sub>π</sub> * | <sup>3</sup> MLLCT; <sup>3</sup> MLLCT |
| T <sub>5</sub>  | 448.276                  | H-3 → L+3 (33%), HOMO → L+4 (30%)  | imd <sub>π</sub> /lr <sub>dπ</sub> → imd <sub>π</sub> *;<br>imd <sub>π</sub> /lr <sub>dπ</sub> → imd <sub>π</sub> * | <sup>3</sup> MLLCT; <sup>3</sup> MLLCT |
| T <sub>6</sub>  | 446.548                  | H-1 → L+2 (38%)                    | phpy <sub>π</sub> → phpy <sub>π</sub> *                                                                             | <sup>3</sup> LC                        |
| T <sub>7</sub>  | 425.492                  | H-3 → LUMO (61%)                   | imd <sub>π</sub> /lr <sub>dπ</sub> → phpy <sub>π</sub> *                                                            | <sup>3</sup> MLLCT                     |
| T <sub>8</sub>  | 420.456                  | H-2 → LUMO (20%), H-2 → L+2 (44%)  | phpy <sub>π</sub> → phpy <sub>π</sub> *;<br>phpy <sub>π</sub> → phpy <sub>π</sub> *                                 | <sup>3</sup> LC; <sup>3</sup> LC       |
| T <sub>9</sub>  | 415.524                  | HOMO → L+1 (90%)                   | imd <sub>π</sub> /lr <sub>dπ</sub> → phpy <sub>π</sub> *                                                            | <sup>3</sup> MLLCT                     |
| T <sub>10</sub> | 415.121                  | H-5 → LUMO (64%)                   | imd <sub>π</sub> /lr <sub>dπ</sub> → phpy <sub>π</sub> *                                                            | <sup>3</sup> MLLCT                     |

**Table S14.** Calculated triplet states for complex [2]<sup>3+</sup>

| Triplet states  | Computed Wavelength (nm) | Major contributions                | Transition                                                                                                            | Nature                                 |
|-----------------|--------------------------|------------------------------------|-----------------------------------------------------------------------------------------------------------------------|----------------------------------------|
| T <sub>1</sub>  | 486.7278805              | HOMO → LUMO (70%)                  | phpy <sub>π</sub> → phpy <sub>π</sub> *                                                                               | <sup>3</sup> LC                        |
| T <sub>2</sub>  | 474.9988239              | H-1 → L+1 (47%), HOMO → LUMO (27%) | imd <sub>π</sub> /lr <sub>dπ</sub> → phpy <sub>π</sub> *;<br>phpy <sub>π</sub> → phpy <sub>π</sub> *                  | <sup>3</sup> MLLCT; <sup>3</sup> LC    |
| T <sub>3</sub>  | 466.2111492              | H-1 → LUMO (62%), H-1 → L+2 (25%)  | imd <sub>π</sub> /lr <sub>dπ</sub> → phpy <sub>π</sub> *;<br>imd <sub>π</sub> /lr <sub>dπ</sub> → phpy <sub>π</sub> * | <sup>3</sup> MLLCT; <sup>3</sup> MLLCT |
| T <sub>4</sub>  | 452.3154683              | H-3 → L+4 (25%), HOMO → L+3 (57%)  | imd <sub>π</sub> /lr <sub>dπ</sub> → imd <sub>π</sub> *;<br>phpy <sub>π</sub> → imd <sub>π</sub> *                    | <sup>3</sup> MLLCT; <sup>3</sup> LC    |
| T <sub>5</sub>  | 448.2760612              | H-3 → L+3 (33%), HOMO → L+4 (30%)  | imd <sub>π</sub> /lr <sub>dπ</sub> → imd <sub>π</sub> *;<br>phpy <sub>π</sub> → imd <sub>π</sub> *                    | <sup>3</sup> LC; <sup>3</sup> LC       |
| T <sub>6</sub>  | 446.5485072              | H-1 → L+2 (38%)                    | imd <sub>π</sub> /lr <sub>dπ</sub> → phpy <sub>π</sub> *                                                              | <sup>3</sup> MLLCT                     |
| T <sub>7</sub>  | 425.4922716              | H-3 → LUMO (61%)                   | imd <sub>π</sub> /lr <sub>dπ</sub> → phpy <sub>π</sub> *                                                              | <sup>3</sup> MLLCT                     |
| T <sub>8</sub>  | 420.4564332              | H-2 → LUMO (20%), H-2 → L+2 (44%)  | phpy <sub>π</sub> → phpy <sub>π</sub> *;<br>phpy <sub>π</sub> → imd <sub>π</sub> *                                    | <sup>3</sup> LC; <sup>3</sup> LC       |
| T <sub>9</sub>  | 415.5244755              | HOMO → L+1 (90%)                   | phpy <sub>π</sub> → phpy <sub>π</sub>                                                                                 | <sup>3</sup> LC                        |
| T <sub>10</sub> | 415.1210132              | H-5 → LUMO (64%)                   | imd <sub>π</sub> /lr <sub>dπ</sub> → phpy <sub>π</sub> *                                                              | <sup>3</sup> MLLCT                     |

**Table S15.** Calculated triplet states for complex [3]<sup>3+</sup>

| Triplet states  | Computed Wavelength (nm) | Major contributions                               | Transitions                                                                                                                                                                     | Nature                                                        |
|-----------------|--------------------------|---------------------------------------------------|---------------------------------------------------------------------------------------------------------------------------------------------------------------------------------|---------------------------------------------------------------|
| T <sub>1</sub>  | 483.8785193              | HOMO → L+1 (61%)                                  | phpy <sub>π</sub> → phpy <sub>π</sub> *                                                                                                                                         | <sup>3</sup> LC                                               |
| T <sub>2</sub>  | 476.9907014              | HOMO → LUMO (72%)                                 | phpy <sub>π</sub> → phpy <sub>π</sub>                                                                                                                                           | <sup>3</sup> LC                                               |
| T <sub>3</sub>  | 454.6541731              | H-1 → LUMO (89%)                                  | imd <sub>π</sub> /lr <sub>dπ</sub> → phpy <sub>π</sub> *                                                                                                                        | <sup>3</sup> MLLCT                                            |
| T <sub>4</sub>  | 450.1314007              | HOMO → L+2 (63%)                                  | phpy <sub>π</sub> → phpy <sub>π</sub>                                                                                                                                           | <sup>3</sup> LC                                               |
| T <sub>5</sub>  | 446.8059858              | H-4 → L+3 (20%), H-3 → L+4 (34%), H-1 → L+3 (29%) | imd <sub>π</sub> /lr <sub>dπ</sub> → imd <sub>π</sub> *;<br>imd <sub>π</sub> /lr <sub>dπ</sub> → imd <sub>π</sub> *;<br>imd <sub>π</sub> /lr <sub>dπ</sub> → imd <sub>π</sub> * | <sup>3</sup> MLLCT; <sup>3</sup> MLLCT;<br><sup>3</sup> MLLCT |
| T <sub>6</sub>  | 446.4681059              | H-3 → L+3 (38%), H-1 → L+4 (24%)                  | imd <sub>π</sub> /lr <sub>dπ</sub> → imd <sub>π</sub> *;<br>imd <sub>π</sub> /lr <sub>dπ</sub> → imd <sub>π</sub> *                                                             | <sup>3</sup> MLLCT; <sup>3</sup> MLLCT                        |
| T <sub>7</sub>  | 425.3463001              | H-2 → LUMO (33%), H-2 → L+2 (40%)                 | phpy <sub>π</sub> → phpy <sub>π</sub> *;<br>phpy <sub>π</sub> → phpy <sub>π</sub> *                                                                                             | <sup>3</sup> LC; <sup>3</sup> LC                              |
| T <sub>8</sub>  | 420.0433412              | H-3 → LUMO (80%)                                  | imd <sub>π</sub> /lr <sub>dπ</sub> → phpy <sub>π</sub> *                                                                                                                        | <sup>3</sup> MLLCT                                            |
| T <sub>9</sub>  | 415.1766166              | H-4 → LUMO (69%)                                  | imd <sub>π</sub> /lr <sub>dπ</sub> → phpy <sub>π</sub> *                                                                                                                        | <sup>3</sup> MLLCT                                            |
| T <sub>10</sub> | 402.689899               | H-2 → L+1 (64%)                                   | phpy <sub>π</sub> → phpy <sub>π</sub> *                                                                                                                                         | <sup>3</sup> LC                                               |

**Table S16.** Calculated triplet states for complex [4]<sup>3+</sup>

| Triplet states  | Computed Wavelength (nm) | Major contributions               | Transition                                                                                                          | Nature                                 |
|-----------------|--------------------------|-----------------------------------|---------------------------------------------------------------------------------------------------------------------|----------------------------------------|
| T <sub>1</sub>  | 490.4438                 | HOMO → LUMO (79%)                 | phpy <sub>π</sub> → phpy <sub>π</sub> *                                                                             | <sup>3</sup> LC                        |
| T <sub>2</sub>  | 489.3598                 | HOMO → L+1 (65%)                  | phpy <sub>π</sub> → phpy <sub>π</sub> *                                                                             | <sup>3</sup> LC                        |
| T <sub>3</sub>  | 456.7983                 | HOMO → L+2 (73%)                  | phpy <sub>π</sub> → phpy <sub>π</sub> *                                                                             | <sup>3</sup> LC                        |
| T <sub>4</sub>  | 452.299                  | H-4 → L+4 (26%), H-2 → L+3 (34%)  | imd <sub>π</sub> /Ir <sub>dπ</sub> → imd <sub>π</sub> *;<br>imd <sub>π</sub> /Ir <sub>dπ</sub> → imd <sub>π</sub> * | <sup>3</sup> MLLCT; <sup>3</sup> MLLCT |
| T <sub>5</sub>  | 451.0813                 | H-4 → L+3 (31%), H-2 → L+4 (28%)  | imd <sub>π</sub> /Ir <sub>dπ</sub> → imd <sub>π</sub> *;<br>imd <sub>π</sub> /Ir <sub>dπ</sub> → imd <sub>π</sub> * | <sup>3</sup> MLLCT; <sup>3</sup> MLLCT |
| T <sub>6</sub>  | 442.3268                 | H-2 → LUMO (89%)                  | imd <sub>π</sub> /Ir <sub>dπ</sub> → phpy <sub>π</sub> *                                                            | <sup>3</sup> MLLCT                     |
| T <sub>7</sub>  | 433.0569                 | H-1 → LUMO (52%), H-1 → L+2 (30%) | imd <sub>π</sub> /Ir <sub>dπ</sub> → imd <sub>π</sub> *;<br>imd <sub>π</sub> /Ir <sub>dπ</sub> → imd <sub>π</sub> * | <sup>3</sup> MLLCT; <sup>3</sup> MLLCT |
| T <sub>8</sub>  | 414.7877                 | H-4 → LUMO (69%)                  | imd <sub>π</sub> /Ir <sub>dπ</sub> → phpy <sub>π</sub> *                                                            | <sup>3</sup> MLLCT                     |
| T <sub>9</sub>  | 411.9761                 | H-1 → LUMO (38%), H-1 → L+2 (23%) | phpy <sub>π</sub> → phpy <sub>π</sub> *;<br>phpy <sub>π</sub> → phpy <sub>π</sub> *                                 | <sup>3</sup> LC; <sup>3</sup> LC       |
| T <sub>10</sub> | 410.4893                 | H-1 → L+1 (62%)                   | phpy <sub>π</sub> → phpy <sub>π</sub> *                                                                             | <sup>3</sup> LC                        |

**Figure S13.**  $^1\text{H}$  NMR spectra of photocatalytic reduction of 4-nitrophenol to 4-aminophenol at different time interval. The reaction mixture consists of 4-nitrophenol (10 mM),  $[\text{4}]^{3+}$  (0.1 mM) and  $\text{NEt}_3$  (1.0 M) in tris buffer (pH-9.1) solution.

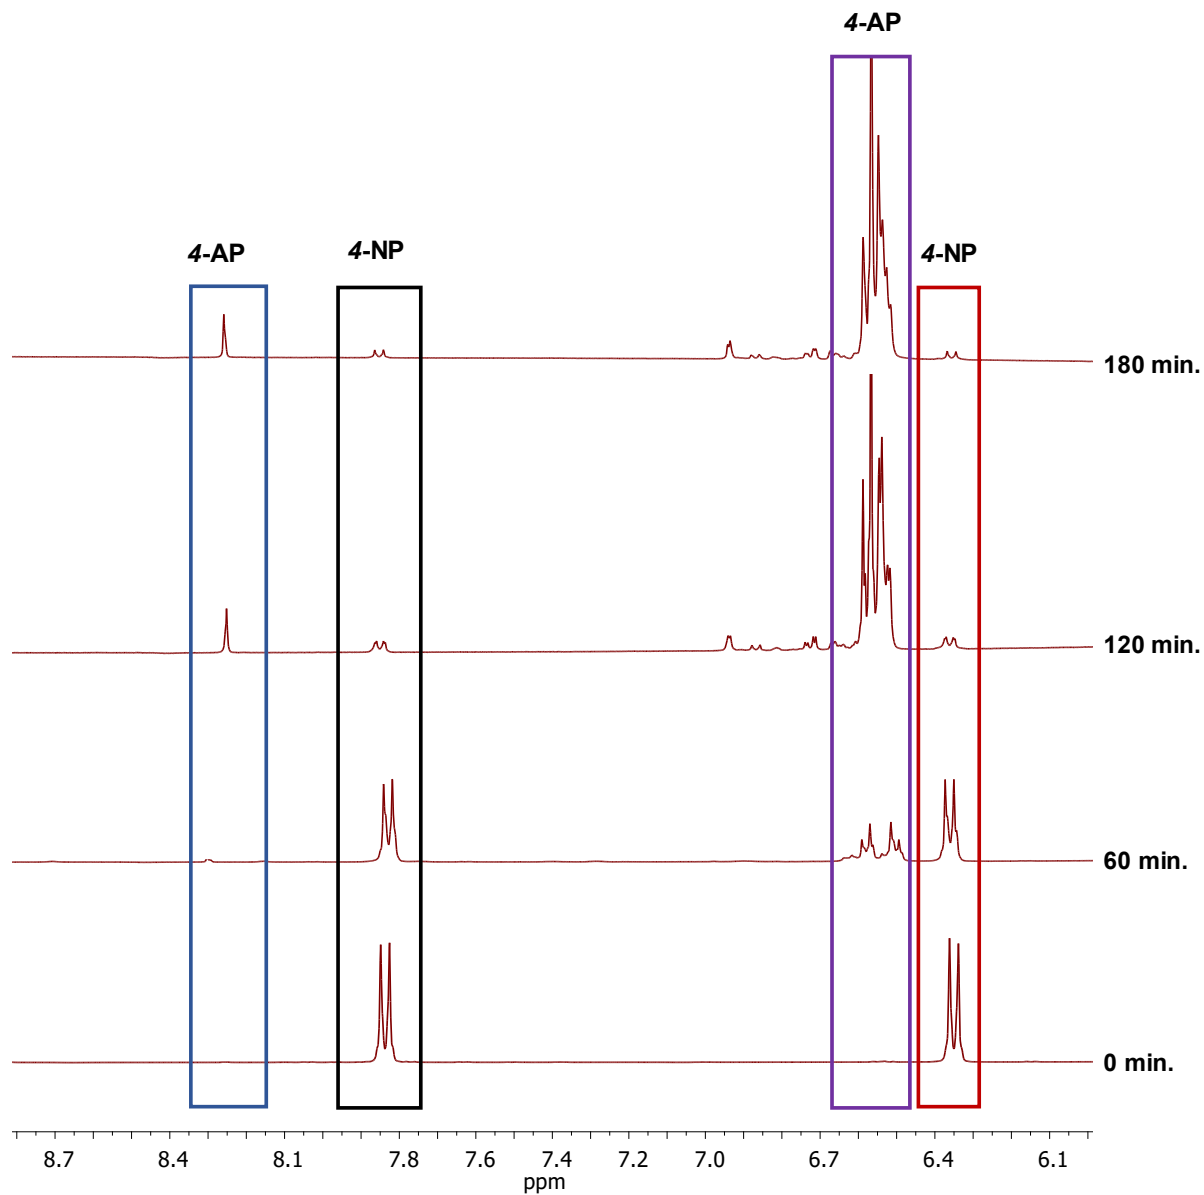

**Figure S14.** Plot for the (a) Absorption spectra of  $[\text{Fe}(\text{Phen})_3]^{2+}$  and (b) absorbance of  $[\text{Fe}(\text{Phen})_3]^{2+}$  (at 510 nm) at different time interval

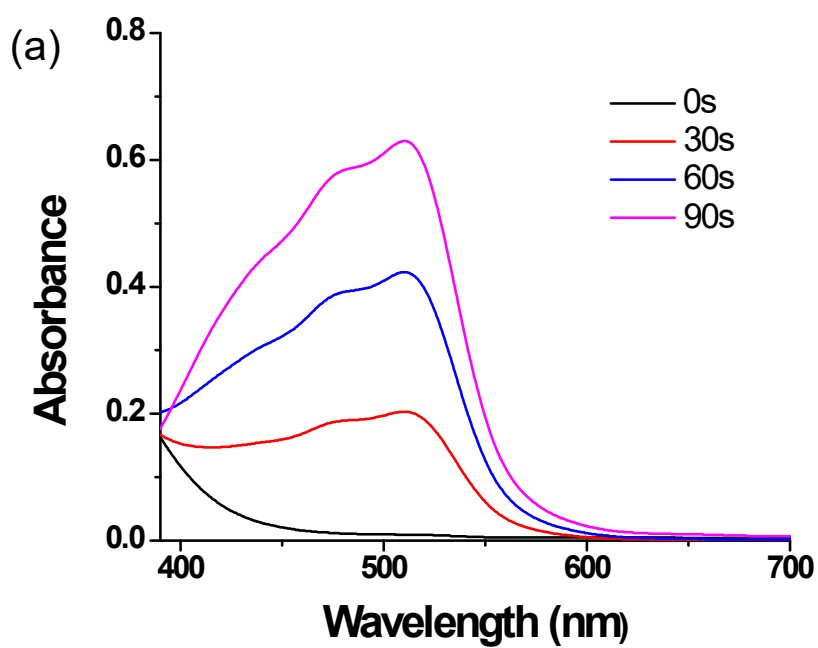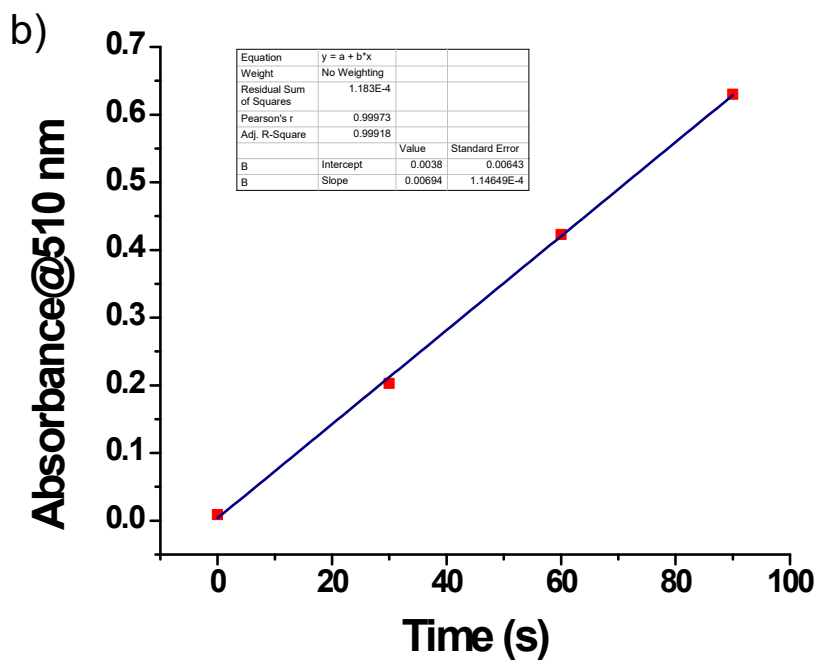

**Figure S15.** Plot for the (a) number of moles of  $\text{Fe}^{2+}$  formed with respect to time (b) number of moles of 4-nitrophenol reduced with respect to the moles of photons absorbed by the complex  $[\mathbf{4}]^{3+}$ .

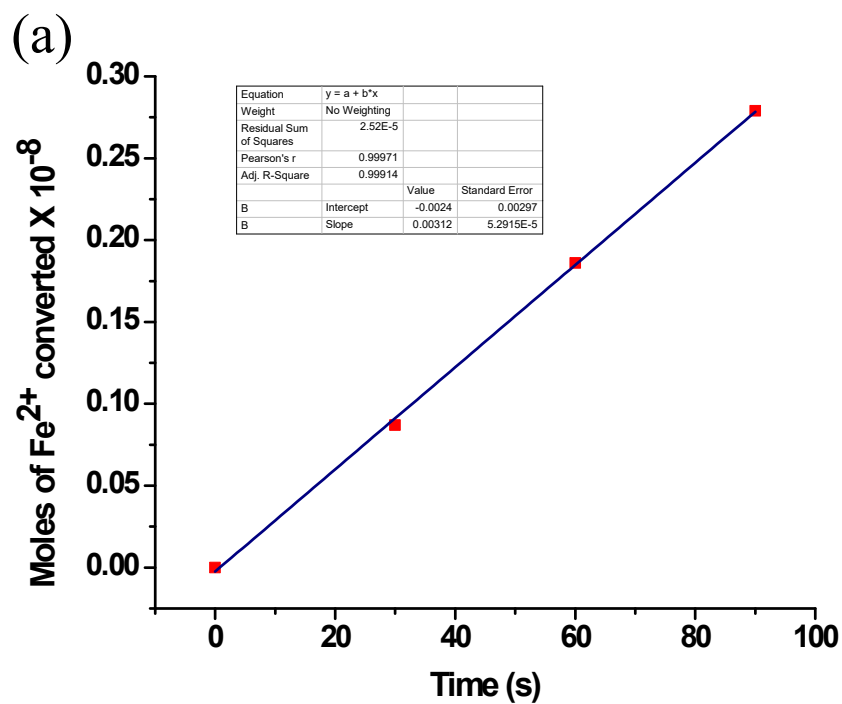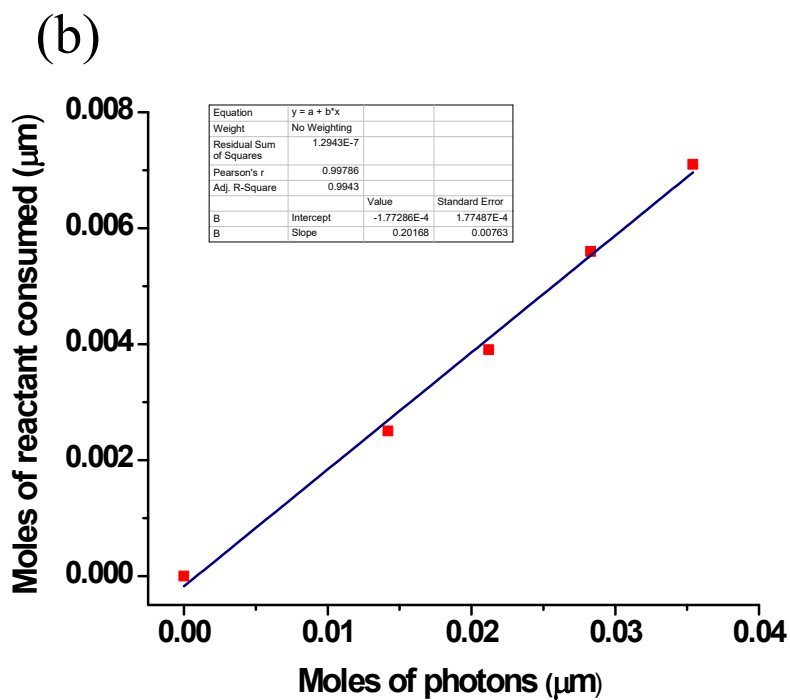

**Figure S16.** Stern-Volmer plot for fluorescence quenching of  $[4]^{3+}$  in the presence of (a)  $\text{NEt}_3$  and (b) 4-nitrophenol and (c) dioxygen in pH-9.1 buffer solution.

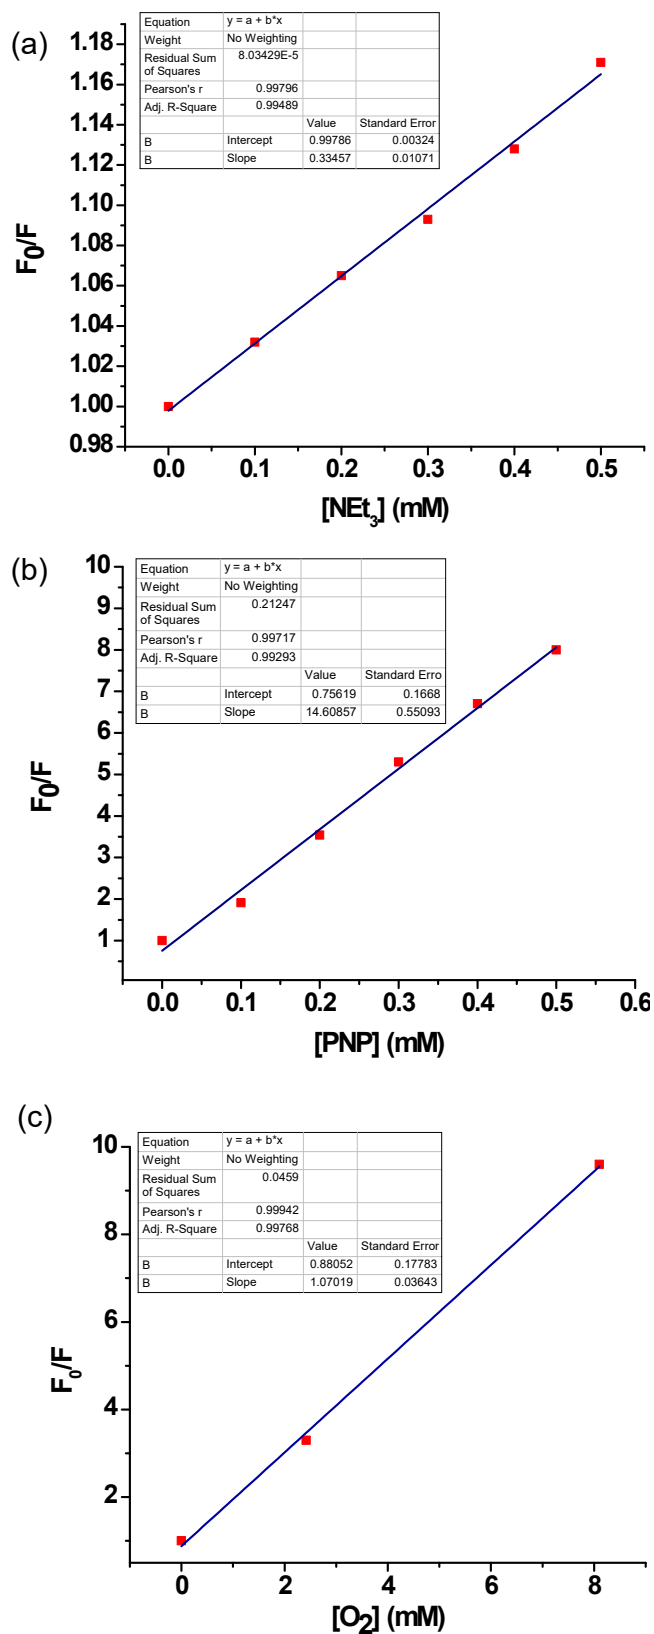



Figure S17. Plausible mechanism for the reduction of 4-nitrophenol by [4]<sup>3+</sup>.<sup>1</sup>

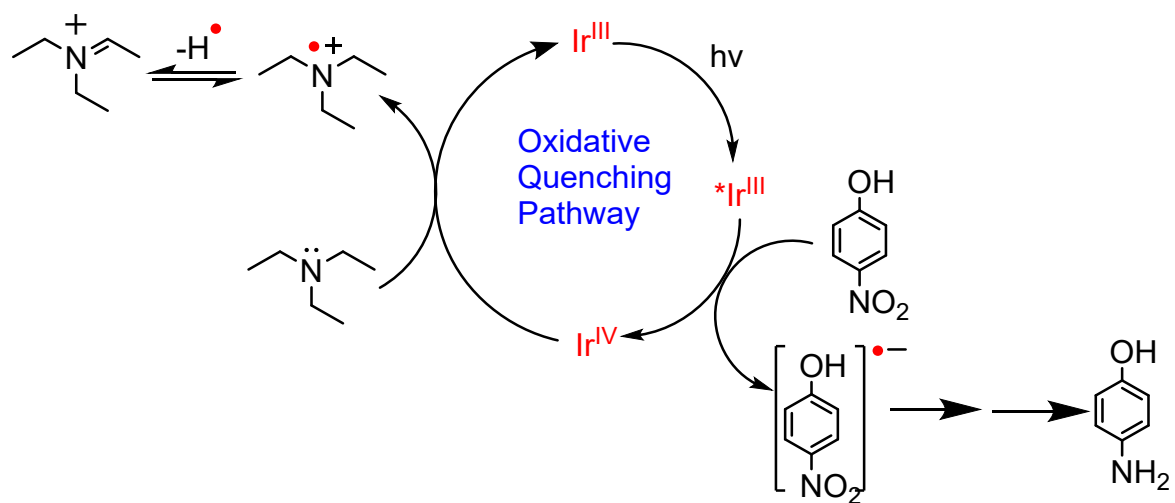

## Reference

1. A.R. Tripathy, A. Kumar, R. Rahmathulla, A. K. Jha and V. R. Yatham, *Org. Lett.* 2022, **24**, 5186–5191
